1  
2        **The *Helicobacter pylori* biofilm involves a multi-gene stress-biased**  
3                    **response including a structural role for flagella**

4  
5  
6                    Skander Hathroubi<sup>#</sup>, Julia Zerebinski and Karen M. Ottemann

7  
8    Department of Microbiology and Environmental Toxicology, University of California, Santa  
9    Cruz, California, 95060 USA

10  
11    Running title: Structural role of flagella in *H. pylori* biofilm

12  
13  
14    **#Corresponding Author:**

15    <sup>#</sup>Address correspondence to Skander Hathroubi, shathrou@ucsc.edu. 1156 High Street, METX.

16    Santa Cruz, CA 95064

17  
18  
19  
20  
21

22 **ABSTRACT**

23

24 *Helicobacter pylori* has an impressive ability to persist chronically in the human stomach.  
25 Similar characteristics are associated with biofilm formation in other bacteria. The *H. pylori*  
26 biofilm process, however, is poorly understood. To gain insight into this mode of growth, we  
27 carried out comparative transcriptomic analysis between *H. pylori* biofilm and planktonic cells,  
28 using the mouse colonizing strain SS1. Optimal biofilm formation was obtained with low serum  
29 and three-day growth, conditions which caused both biofilm and planktonic cells to be ~80%  
30 coccoid. RNA-seq analysis found that 8.18% of genes were differentially expressed between  
31 biofilm and planktonic cell transcriptomes. Biofilm-downregulated genes included those  
32 involved in metabolism and translation, suggesting these cells have low metabolic activity.  
33 Biofilm-upregulated genes included those whose products were predicted to be at the cell  
34 envelope, involved in regulating a stress response, and surprisingly, genes related to formation of  
35 the flagellar apparatus. Scanning electron microscopy visualized flagella that appeared to be a  
36 component of the biofilm matrix, supported by the observation that an aflagellated mutant  
37 displayed a less robust biofilm with no apparent filaments. We observed flagella in the biofilm  
38 matrix of additional *H. pylori* strains, supporting that flagellar use is widespread. Our data thus  
39 supports a model in which *H. pylori* biofilm involves a multi-gene stress-biased response, and  
40 that flagella play an important role in *H. pylori* biofilm formation.

41

42 **IMPORTANCE**

43

44 Biofilms, communities of bacteria that are embedded in a hydrated matrix of extracellular  
45 polymeric substances, pose a substantial health risk and are key contributors to many chronic and  
46 recurrent infections. Chronicity and recalcitrant infections are also common features associated  
47 with the ulcer-causing human pathogen *H. pylori*. However, relatively little is known about the  
48 role of biofilms in *H. pylori* pathogenesis as well as the biofilm structure itself and the genes  
49 associated with this mode of growth. In the present study, we found that *H. pylori* biofilm cells  
50 highly expressed genes related to cell envelope, stress response and those encoding the flagellar  
51 apparatus. Flagellar filaments were seen in high abundance in the biofilm. Flagella are known to  
52 play a role in initial biofilm formation, but typically are downregulated after that state. *H. pylori*  
53 instead appears to have co-opted these structures for non-motility roles, including a role building  
54 a robust biofilm.

55

56 **KEYWORDS**

57

58 *Helicobacter pylori*, biofilm, flagella, stress, metabolism, RNA-seq, transcriptome

## 59 INTRODUCTION

60

61 *H. pylori* has been co-evolving with humans for tens of thousands of years (1). During  
62 this time, it has adapted to survive the hostile environment of the stomach and evade the immune  
63 system, allowing it to persist for the life of the host (2). *H. pylori* colonizes gastric epithelial  
64 surfaces and within the thin layer of mucus near the cells (3). More recently, *H. pylori* was found  
65 to colonize within gastric glands, repeated invaginations of the gastrointestinal tract, which may  
66 provide the bacteria a favorable niche (4, 5). Even though most infections are asymptomatic, *H.*  
67 *pylori* persistence is considered a major risk factor for gastric and duodenal ulcers, gastric  
68 Mucosa-Associated Lymphoid Tissue (MALT) lymphoma, and gastric adenocarcinoma (6). *H.*  
69 *pylori* infections remain difficult to treat, and when left untreated (7), 1-2% progress to gastric  
70 cancer (8, 9).

71 *H. pylori* possesses several mechanisms to escape the challenging environment of the  
72 stomach where the pH is around 2. These include urease production, flagellar motility, and  
73 chemotaxis, which are all required for the initial and sustained colonization of the gastric  
74 epithelial surface (10). Urease catalyzes the hydrolysis of urea, which is abundant in stomach,  
75 into bicarbonate and ammonia and thus raises the pH to near neutral (10). pH elevation decreases  
76 the viscoelastic properties of mucus gel and improves the motility of *H. pylori*, which can then  
77 swim away from the lumen to reach safer niches including those close to the gastric epithelial  
78 surface (11). *H. pylori* forms microcolonies at the cell surface *in vitro* (12, 13) as well as within  
79 gastric glands (5). This microcolony mode of growth may be consistent with the bacteria being in  
80 a biofilm-growth mode.

81 Biofilms are dense aggregates of microorganisms attached to a surface and embedded in  
82 an extracellular polymeric matrix (14). In contrast with the other mode of bacterial growth, free-

83 floating or planktonic, biofilm cells tend to be more tolerant towards antimicrobials and host  
84 immune responses (14, 15). Biofilms are also frequently associated with chronic disease  
85 including pneumonia in cystic fibrosis patients, Lyme disease, and chronic otitis media (16-18).  
86 In those chronic diseases, biofilm growth is considered to be a survival strategy used by  
87 pathogens to escape antimicrobial therapies, avoid clearance by the immune system, and to  
88 persist for the lifetime of the host.

89         Chronicity and recalcitrant infections are also common features associated with *H. pylori*  
90 (19). Yet, the role of biofilm growth in promoting *H. pylori* persistence is still not clear (20). The  
91 first suggestion of biofilm formation by *H. pylori* during colonization of the human gastric  
92 mucosa was found using biopsies and scanning electron microscopy (SEM) analysis (20-22).  
93 These studies demonstrated that gastric biopsy samples from *H. pylori*-positive patients showed  
94 dense layers of bacteria aggregated and attached to the mucosal surface. The bacteria were  
95 consistent in appearance to *H. pylori* with cells in both the spiral and coccoid morphologies. The  
96 same bacterial-appearing structures were absent in *H. pylori*-negative patients, however there has  
97 not yet been conclusive evidence showing that *H. pylori* forms a biofilm *in vivo*.

98         *H. pylori* has been well documented to form a biofilm *in vitro*. The first report of *in vitro*  
99 biofilm formation by *H. pylori* was described to occur in clinical, laboratory, and mouse-adapted  
100 strains, and was observed at the air-liquid interface on glass coverslips when the bacteria were  
101 grown in Brucella broth (BB) supplemented with slightly lower than normal fetal bovine serum  
102 (FBS) (23). The biofilms were mainly composed of coccoid bacteria, with a minority of spiral  
103 and rod shaped ones (23). In subsequent reports, scientists analyzed the extracellular polymeric  
104 substance (EPS) of *H. pylori* biofilms and found proteomannans, LPS-related structures,  
105 extracellular DNA, proteins, and outer membrane vesicles (24, 25).

106           Additionally, biofilm cells have been shown to exhibit high resistance *in vitro* to  
107 clarithromycin, which is one of the common antibiotics used to treat *H. pylori* infection (26). The  
108 minimum inhibitory concentration (MIC) and the minimum bactericidal concentration (MBC)  
109 were increased by 16-and 4-fold, respectively, in the biofilm cells as compared to planktonic  
110 ones (26). However, despite the growing evidences of *H. pylori* biofilm formation both *in vitro*  
111 and *in vivo* (20-22, 24), little is known about the genes involved in biofilm formation. We thus  
112 sought to characterize *H. pylori* biofilm and investigate global transcriptional changes during  
113 biofilm formation, with a particular focus on *H. pylori* strain SS1 because it is able to colonize  
114 mice and thus will be able to serve as a model for biofilm formation *in vivo*.

115 **RESULTS**

116

117 **Biofilm formation and growth condition.** *H. pylori* strain SS1 has been extensively used as a  
118 murine model of *H. pylori* infection. *H. pylori* SS1 biofilms, however, are difficult to detect  
119 when the bacteria are grown in standard nutrient-rich media routinely used for *H. pylori* culture.  
120 A previous study reported that *H. pylori* biofilm formation was significantly dependent on the  
121 growth media used (27). We thus evaluated the ability of the *H. pylori* SS1 strain to form a  
122 biofilm using the crystal violet biofilm assay, and bacteria grown under varying growth  
123 conditions that included different growth media, incubation times, and concentrations of serum.

124 Using Brucella Broth (BB) media supplemented with 10% FBS (BB10), the condition  
125 usually used for *H. pylori* liquid growth, no biofilm was detected. We therefore explored lower  
126 amounts of serum, as these have been reported elsewhere to promote adhesion of *H. pylori* strain  
127 26695 (28) and biofilm formation of reference *H. pylori* strain ATCC 43629 and clinical strains  
128 *H. pylori* 9/10 (27). While only a slight biofilm was observed when *H. pylori* SS1 strain was  
129 grown with BB supplemented with 6% FBS, a pronounced biofilm ( $p < 0.01$ ) was detected in BB  
130 supplemented with 2% FBS (BB2) (Fig. 1A). The *H. pylori* growth rate was slightly reduced in  
131 BB2 compared with BB10, which suggests that the increase of biofilm formation was not due to  
132 increased growth (data not shown). HAMS F12 similarly only supported biofilm formation with  
133 low FBS percentages (Fig. 1B). Further experiments identified that three days of growth in BB2  
134 led to the greatest amount of biofilm (Fig. 1C). These results thus suggest that BB media  
135 supplemented with 2% serum and growth for three days is an optimal condition for studying *H.*  
136 *pylori* SS1 biofilm formation.

137

138 **Biofilm characterization.** To confirm and extend the results obtained with the crystal violet  
139 biofilm assay, biofilms of *H. pylori* SS1 were visualized by confocal laser scanning microscopy  
140 (CLSM) and staining with FilmTracer™ FM®1–43, a dye that fluoresces once inserted into the  
141 cell membrane. After three days of growth in BB2, we observed a thick bacterial biomass that  
142 non-homogeneously covered the surface, consistent with a well-developed biofilm (Fig. 2).  
143 Using z-stack images, the thickness of the *H. pylori* SS1 biofilm was determined to be  $11.64 \pm$   
144  $2.63 \mu\text{m}^3/\mu\text{m}$  (Supplementary Movie 1). As expected, *H. pylori* SS1 grown in BB10 did not form  
145 a biofilm that could be visualized with CLSM (data not shown).

146 To further characterize the EPS that composed the SS1 biofilm matrix, BOBO-3 and  
147 FilmTracer SYPRO Ruby biofilm matrix stains were used to stain extracellular DNA (eDNA)  
148 and extracellular proteins, respectively as described previously (29, 30). Both of these molecules  
149 extensively stained the biofilm EPS, consistent with the idea that the *H. pylori* SS1 biofilm  
150 matrix contains significant amount of eDNA and extracellular proteins (Fig. 2B and C). Because  
151 these same molecules have been detected in other *H. pylori* strains, these results suggest that the  
152 *H. pylori* EPS is typically composed of eDNA and proteins (24, 31).

153 We also performed live-dead staining with the FilmTracer LIVE/DEAD biofilm viability  
154 kit, to define whether the biofilm cells were alive or dead. This approach revealed a  
155 subpopulation of dead or damaged cells, stained red, that appear to be homogeneously  
156 distributed within the live biofilm cells, which stained green (Fig. 2D-F). This result suggests  
157 that the *H. pylori* biofilm contains both live and dead cells.

158 To determine the importance of extracellular proteins and eDNA in the biofilm matrix of  
159 *H. pylori* SS1, we employed enzymatic treatment using DNase I and proteinase K. Proteinase K  
160 treatment significantly dispersed pre-formed biofilms ( $P < 0.01$ ) (Fig. 3). *H. pylori* pre-formed



161 biofilms were, however, resistant to DNase treatments. These data suggest that DNA may play  
162 only a minor role in the biofilm matrix, however, extracellular proteins likely play an important  
163 role in the biofilm architecture of *H. pylori*, as has been reported in other *H. pylori* strains (24,  
164 31). These results suggest that many *H. pylori* strains, including SS1, use a protein-based biofilm  
165 matrix.

166

167 ***Transcriptomic profiling of biofilm versus planktonic cells.*** To gain insight into the genes  
168 involved in *H. pylori* biofilm growth, we performed a transcript profiling experiment using  
169 RNA-seq. For this experiment, we grew *H. pylori* SS1 in BB2 in six well plates for three-days,  
170 and collected the free-floating planktonic cells and the bottom-attached biofilm ones from the  
171 same wells. We collected RNA from three biological replicates grown on two separate days. A  
172 total of 10-20 million reads per sample was generated by RNA-seq. These reads were then  
173 mapped to *H. pylori* SS1 complete reference genome (32), and revealed a clear clustering of the  
174 biofilm-grown cells in a distinct population compared to the planktonic ones (Fig. 4A). This  
175 transcriptomic analysis showed that 122 of 1491 genes (8.18%) were significantly differentially  
176 expressed ( $p < 0.01$  and  $\log_2$ -fold change  $>1$  or  $<-1$ ) between *H. pylori* biofilm and planktonic  
177 populations (Fig. 4B and Fig. 5). 61 genes were significantly upregulated in biofilm cells  
178 compared to their planktonic counterparts, while another 61 were significantly upregulated in  
179 planktonic cells (Table 2 and 3). To validate the results obtained by this RNA-seq, the relative  
180 abundance of selected RNA transcripts was quantified by quantitative RT-PCR (qRT-PCR).  
181 Using this approach, we detected the same gene expression trend between qRT-PCR and RNA-  
182 seq, thus validating our results (Fig. 6). Below we discuss the most prominent of these genes, and  
183 what they suggest about the *H. pylori* biofilm growth state.

184 Our data suggest that biofilm cells may be less metabolically active than planktonic cells,  
185 based on the decreased expression of several genes involved in translation and ribosomal  
186 structure (Fig. 5, Table 3). Similarly, genes involved in metabolism, biosynthesis of cofactors,  
187 and urease were also down-regulated (Fig. 5, Table 3).

188 We found evidence that biofilms cells experience a stressful environment. Indeed, genes  
189 coding for several stress response-related genes such as *hrcA*, *hspR*, *crdR*, *recR* and *pgdA* were  
190 up-regulated in biofilm cells (Table 2). The *hspR* and *hrcA* genes code for transcriptional  
191 repressor proteins belonging to the heat shock protein family, and were both up-regulated in  
192 biofilm cells. The *crdR* gene, which encodes a copper-related transcriptional response regulator  
193 was also up-regulated in *H. pylori* biofilm cells. Several transcripts encoding for oxidative stress  
194 resistance were similarly up-regulated in biofilm cells. These included *recR*, a gene encoding for  
195 a DNA recombination protein, as well as *pgdA* which encodes for a peptidoglycan deacetylase.  
196 These have both been previously associated with oxidative stress in *H. pylori* (33).

197 We found that the ATP-dependent protease HslV gene was among the most down-  
198 regulated genes in *H. pylori* biofilm (Table 3). Although this protein has not yet been studied in  
199 the context of *H. pylori* biofilms, the orthologous *E. coli* HslV protease has been previously  
200 associated with biofilm dispersal (34).

201 Our data suggest that biofilm cells may be less virulent in some ways, but more in others.  
202 Transcripts coding for some *H. pylori* virulence, colonization or immunogenic factors were low  
203 in biofilm cells, including the UreA subunit of urease, the GroEL chaperone, and the HcpC  
204 cysteine rich protein. These have each been shown to play roles in colonization or promoting  
205 inflammatory gene expression (35-37). On the other hand, only three genes encoded within the  
206 cytotoxin-associated gene pathogenicity island (*cagPAI*) (38, 39) *cagL*, *cagW* and *cagE* were

207 significantly highly expressed in biofilm cells of *H. pylori*. These genes are in separate operons  
208 (38), and encode for cag pathogenicity island protein CagL/Cag18, an integrin binding protein at  
209 the cag pilus tip, cag pathogenicity island protein CagW/Cag10 and type IV secretion system  
210 protein CagE/virB4, both part of the inner membrane protein transfer complex (39).

211 Many genes related to the cell envelope were up-regulated in biofilm cells (Fig. 5).  
212 Indeed, genes coding for proteins involved in lipopolysaccharide synthesis such as *lpxB*, which  
213 encodes a lipid-A disaccharide synthase, and *lptB*, which encodes a lipopolysaccharide export  
214 system ATPase, were up-regulated in biofilm cells (Table 2). Numerous transcripts encoding  
215 cytoplasmic and outer membrane proteins were also elevated in biofilm cells (i.e. *homC*, *homD*  
216 and HPYLSS1\_00450) (Table 2).

217 Interestingly, the majority of the upregulated cell envelope genes in biofilm cells encoded  
218 for flagellar structure and biosynthesis proteins such as *flgL*, *flgK*, *fliD* and *flgE*, which encode  
219 for flagellar hook-associated proteins (Table 2). Two known or putative flagellin genes, *flaB* and  
220 *flaG* were also upregulated in the biofilms (Table 2). These data suggested the intriguing idea  
221 that flagella might play a role in the *H. pylori* biofilm.

222

223 ***Flagella are present and play a structural role in H. pylori biofilms.*** The transcriptomic data  
224 above suggested that flagellar components are upregulated in the biofilm cells, so we used SEM  
225 to gain insights into the biofilm architecture of *H. pylori*. This analysis demonstrated three-  
226 dimensional structures composed of bacterial cells adherent to one another and to the surface  
227 (Fig. 7A). Biofilms contained mainly coccoid cells along with some rod-shaped cells (Fig. 7A),  
228 as described previously for *H. pylori* biofilms (20-23). When compared to planktonic

229 populations, the proportion of both morphologies were similar at ~ 80% coccoid cells (data not  
230 shown).

231           Interestingly, extensive networks of bundles of filaments were visible in the biofilms.  
232 In some cases, these appeared to be connected to the bacterial pole, as would be expected for  
233 flagella (Fig. 7A, arrowheads). We measured the dimensions of the filaments to see if they were  
234 consistent in size with flagella. The width and the length measured at 20 to 30nm and 3 to 4 $\mu$ m,  
235 respectively, and were in agreement with those reported previously for *H. pylori* flagella (40).  
236 This data, especially when combined with transcriptomics, suggested these structures could be  
237 flagella. We therefore analyzed a mutant strain that lacks a key component of the flagellar basal  
238 body, *FliM*, and is aflagellated (41). SEM analysis of the  $\Delta$ *fliM* mutant showed a complete loss  
239 of flagella (Fig. 7A). This mutant displayed significantly less biofilm biomass (Fig. 7B), but we  
240 were able to find few microcolonies. Within these microcolonies, the filaments were completely  
241 lacking (Fig. 7A). These results suggest that these filaments are flagella, and furthermore that  
242 flagella and/or motility are important for biofilm formation.

243           To further dissect the roles of motility and flagella in biofilm formation, we analyzed  
244 biofilm formation in a non-motile but flagellated strain created by disruption of the motor protein  
245 *MotB*. As reported previously, this mutant still expresses flagella (Fig. 7A). Biofilm formation,  
246 however, was severely impaired compared to the wild-type strain, which suggest that a lack of  
247 motility might contribute to the biofilm defect. However,  $\Delta$ *motB* produced significantly more  
248 biofilm than  $\Delta$ *fliM* mutant suggesting that the flagella structure even in absence of motility also  
249 contributes to biofilm formation in *H. pylori*.

250           To examine whether other strains of *H. pylori* similarly use flagella in biofilms, we  
251 imaged the biofilm of *H. pylori* strain G27 and similar flagellar mutants as used above. Wild-

252 type *H. pylori* G27 biofilm cells also contained filaments consistent with flagella (Fig. 8A). As  
253 with strain SS1, mutants lacking flagella (*flgS* or *fliA*) formed very weak biofilms, while strains  
254 that had flagella but no motility (*motB*) retained partial biofilm formation (Fig. 8B).

255 Taken together, these data suggest that flagella are produced by *H. pylori* when in a  
256 biofilm, and appear to play roles in addition to simple motility, promoting biofilm integrity by  
257 holding cells together and to the surface,

258

259 **DISCUSSION**

260

261 In this report, we present the first transcriptomics characterization of the *H. pylori*  
262 biofilm. This study demonstrated clearly distinct expression profiles between planktonic and  
263 biofilm cells. The biofilm cells were characterized by low metabolic activity and triggering of  
264 several stress responses. Among the upregulated genes in the biofilm cells, we found several  
265 genes associated with cell membrane proteins, outer membrane proteins, stress response, and  
266 surprisingly, genes related to the flagellar apparatus. SEM analysis confirmed that flagella are  
267 present in a mature *H. pylori* biofilm, and appear to play a role in maintaining solid biofilm  
268 structures. This result was somewhat surprising, as typically flagella are proposed to be turned  
269 off during the sessile biofilm growth mode (42-44). Recent work however, discussed below, has  
270 suggested that flagella in *E. coli* biofilms may play a structural role. Our studies with *H. pylori*  
271 thus build on an emerging theme that flagella are not always turned off in mature biofilms, and  
272 indeed may play important functions in biofilm structure

273 To gain insights into the mechanisms behind the biofilm formation in *H. pylori*, we used  
274 RNA sequencing and carried out a comparative transcriptomic analysis between biofilm cells  
275 and those in the planktonic state. Using this approach, we observed that 8.18% of genes were  
276 significantly differentially expressed between biofilm and planktonic cells, similar to that  
277 reported in other bacterial systems (43, 45, 46). In our experimental design, we compared a static  
278 biofilm mode of growth, where attached cells adhered to the bottom of the wells, with planktonic  
279 non-attached cells in the same wells. This approach was used to maintain the same growth  
280 conditions as much as possible between biofilm and planktonic samples, and likely contributed  
281 to the relatively small number of differentially expressed genes. However, since biofilm  
282 formation is a dynamic process with frequent switching between planktonic to biofilm modes

283 occurring frequently, we likely have some contamination between the biofilm and planktonic  
284 populations. Therefore, our method may have missed some genes that are expressed in either  
285 population.

286 One of the findings from our transcriptomic analysis was that several flagellar protein  
287 transcripts were significantly elevated in the biofilm. Notably, these were not for the entire  
288 flagellum, but instead specific genes encoding the rod, hook, and filament. Specifically, we saw  
289 biofilm-cell overexpression of genes encoding for the FlgB rod protein, the FlgE flagellar hook  
290 protein, the FlgK and FlgL hook-filament junction proteins, the FliK hook length control protein  
291 and two flagellins (FlaB and the putative flagellin encoded by FlaG). Notably absent was the  
292 gene for the major flagellin FlaA, and genes for the motor and stator. We also saw the up-  
293 regulation of *flgM* which encodes an anti-sigma factor that interacts with flagellar sigma factor  
294 FliA, and therefore would be expected to decreased expression of *flaA* (47).

295 Historically, flagella have been typically viewed as important only for initial biofilm  
296 attachment and later cell dispersion (44, 48). In fact, it has often been suggested that genes  
297 encoding for flagella are turned off in mature biofilms (42-44). However, other reports have  
298 shown that some microbes express flagella during all stages of biofilm development and not only  
299 during the attachment and dispersion processes (49, 50). In *E. coli*, several flagellar-biosynthesis  
300 genes were induced in mature biofilms, and around 20 flagellar genes were regulated throughout  
301 all stages of biofilm development and not simply turned off (49). *E. coli* flagella were proposed  
302 to have a structural role along with other matrix components (i.e. eDNA and extracellular  
303 proteins), acting to cement and hold cells together and to the surface (50, 51). Our data  
304 furthermore showed that aflagellated mutants are poor biofilm formers, supporting that these  
305 filaments could play a structural role. Taken together, these findings suggest that flagella of *H.*

306 *pylori* may play a structural role during biofilm formation to help bacteria attach to each other  
307 and to surfaces.

308         Interestingly, we found that the HspR and HrcA transcriptional repressor proteins are up-  
309 regulated in biofilm cells. These proteins had previously been shown to positively correlate with  
310 flagella expression (52), providing candidate regulatory proteins that function in biofilm cells.  
311 HspR and HrcA belong to the heat shock protein family, and have been shown to respond to heat  
312 shock temperature conditions although the nature of their “true” signal is not yet clear (52, 53). A  
313 previous comparative transcriptomic analysis of wild-type *H. pylori* along with  $\Delta hspR$ ,  $\Delta hrcA$ ,  
314 and double mutants revealed a set of 14 genes that were negatively regulated and 29 genes that  
315 were positively regulated by these transcriptional regulators (52). The regulated genes include  
316 those for chaperones, urease enzyme activity, adhesion to epithelial cells and flagella.  
317 Interestingly, among the 29 positively regulated genes, nearly half (14) encoded for flagellar  
318 genes, including the *flgM*, *flaG*, *fliD*, *flgK*, *flgB*, *flgE* and *fliK* transcripts we identified here.  
319 Thus, our data suggest that biofilm conditions activate expression of HrcA and HspR, which in  
320 turn upregulate a subset of flagellar genes.

321         Experiments suggest that HrcA and HspR regulators do not directly regulate the flagellar  
322 genes (52). However, they do directly repress expression from several promoters including those  
323 upstream of the *groESL*, *hrcA-grpE-dnaK*, and *cbpA-hspR-hp1026* operons. These gene products  
324 encode the major chaperones of *H. pylori* (52-54). Heat shock conditions relieve the repression,  
325 and allow expression of these operons. Consistent with elevated expression of HspR and HrcA,  
326 we found the genes coding for the heat shock protein GroEL to be downregulated in biofilm. Our  
327 data suggest that some yet-to-be determined conditions occurring during biofilm formation  
328 trigger the expression of HspR and HrcA regulators.



329 Other genes associated with stress responses were also up-regulated in biofilm cells  
330 including the *pgdA* and *recR* genes. These genes encode for a peptidoglycan deacetylase and  
331 DNA recombination protein, respectively. RecR has been shown to be involved in repairing in  
332 DNA double strand breaks induced by oxidative stress (55) and the *recR* mutant was highly  
333 sensitive to DNA damaging agents, oxidative stress and had a reduced ability to colonize mouse  
334 stomachs (55). *pgdA* has been reported to be highly induced by oxidative stress (33, 56). Up-  
335 regulation of oxidative stress genes has previously been reported in biofilm cells of other  
336 organisms including *E. coli* (57), *Pseudomonas aeruginosa* (42), *Neisseria gonorrhoeae* (58) and  
337 *Clostridium perfringens* (48).

338 As reported for other microorganisms, *H. pylori* biofilm cells have altered metabolism,  
339 typically thought to be associated with the restricted availability of nutrients (48, 59). *H. pylori*  
340 biofilm cells were characterized by a downregulation of the expression of multiple genes  
341 involved in metabolism and translation including, *atpC*, *atpE*, *nifU* and several ribosomal protein  
342 genes. This low metabolism phenotype seems not be related simply to the presence of coccoid  
343 cells, but rather to the microenvironment generated during biofilm formation since the proportion  
344 of rods and coccoid forms did not differ between planktonic and biofilm populations.

345 *H. pylori* biofilm cells may also actively block the translational machinery, as suggested  
346 by the up-regulation of the gene encoding RsfS, a ribosomal silencing factor. This protein was  
347 previously described in *E. coli* and *Mycobacterium tuberculosis* to slow or block the translation  
348 machinery during stationary phase and/or nutrition-deficiency stress (60). It interacts with the  
349 50S large ribosomal subunit, prevents its association with the 30 S ribosomal subunit, and thus  
350 blocks formation of functional ribosomes (60). Whether it functions similarly in *H. pylori*  
351 remains to be determined.

352           These observations that biofilm cells may have decreased translation are relevant because  
353 at least two of the main antibiotics used to treat *H. pylori* infection, clarithromycin and  
354 tetracycline, inhibit the 50S and 30S ribosomal subunits, respectively. Thus, these antibiotics  
355 may have less impact on biofilm cells. In fact, recent *in vitro* studies have shown that  
356 clarithromycin is 4 to 16-fold less effective on *H. pylori* biofilm cells as compared to planktonic  
357 ones (26, 61).

358           Taken together, our study has shown that *H. pylori* biofilm cells display a distinct  
359 transcriptomic profile compared to their planktonic counterparts. Lower metabolism and stress  
360 responses, likely associated to the microenvironment generated in the *H. pylori* biofilm, could be  
361 determinants of antimicrobial tolerance and involved in the persistence and survival of *H. pylori*.  
362 However, the up-regulated and down-regulated genes identified in this study are not specific for  
363 biofilm cells, and stress response genes have been previously observed in other conditions when  
364 both planktonic or biofilm cells were exposed to various stresses. Therefore, our data do not  
365 support the existence of a biofilm-specific genetic program. Additionally, our data show that  
366 flagella filaments are upregulated in biofilm cells and form an integral part of the biofilm matrix.  
367 Indeed, *H. pylori* without flagella form weak biofilms. These results thus contribute to correcting  
368 the idea that flagella are only involved during the first and last steps of biofilm formation, and  
369 instead support their importance throughout the biofilm process.  
370

371 **MATERIALS AND METHODS**

372

373 ***Bacterial strain and growth conditions.*** *H. pylori* Sydney strain 1 (SS1) (62) and all other *H.*  
374 *pylori* strains used in this study are listed in Table.1. Strains were grown on Columbia Horse  
375 Blood Agar (CHBA), containing: 0.2%- $\beta$ -cyclodextrin, 10 $\mu$ g/ml vancomycin, 5 $\mu$ g/ml of  
376 cefsulodin, 2.5 U/ml polymyxin B, 5 $\mu$ g/ml trimethoprim, and 8 $\mu$ g/ml amphotericin B (all  
377 chemicals from Thermo Fisher or Gold Biotech). Cultures were grown under micro-aerobic  
378 conditions (5% O<sub>2</sub> and 10% CO<sub>2</sub>) at 37°C. For liquid culture and biofilm assay, *H. pylori* was  
379 grown in Brucella broth (Difco) containing 10% heat inactivated fetal bovine serum (FBS)  
380 (BB10; Gibco/BRL) with constant shaking under microaerobic conditions. For biofilm  
381 formation, several conditions were tested including Brucella broth containing different  
382 percentage of FBS (BB2, BB6 and BB10), and HAM's F-12 (PAA Laboratories GmbH,  
383 Pasching, Austria) containing 10% or 2% of FBS (HAMS10 and HAMS2).

384

385 ***Biofilm assays.*** Biofilm formation assays were carried as described previously, with slight  
386 modification (27). *H. pylori* SS1 was grown overnight in BB10 as above, diluted to and OD600  
387 of 0.15 with fresh BB10, BB2, BB6 or HAMS media as desired, and then used to fill triplicate  
388 wells of a sterile 96-well polystyrene microtiter plate (Costar, 3596). Following static incubation  
389 of 1, 2, 3 or 5 days under micro aerobic conditions, culture medium was removed by aspiration  
390 and the plate was washed twice using PBS. The wells were then filled with 200 $\mu$ L of crystal  
391 violet (0.1 % wt/vol), and the plate was incubated for 2 min at room temperature. After removal  
392 of the crystal violet solution by aspiration, the plate was washed twice with PBS and dried for 20

393 min at room temperature. To visualize biofilms, 200  $\mu$ L of ethanol (70% vol/vol) was added to  
394 the wells and the absorbance at 590 nm was measured.

395  
396 ***Biofilm dispersion assays.*** To evaluate the composition of SS1 biofilm matrix, we assessed the  
397 response of preformed biofilms to different enzymatic treatment. DNase I and proteinase K  
398 (both from Sigma-Aldrich) were used to target, extracellular DNA and extracellular proteins,  
399 respectively. Biofilms were grown as described above and after three-days of growth, the old  
400 media were replaced by fresh media containing different concentrations of DNase I (380 $\mu$ g/ml to  
401 95 $\mu$ g/ml) or proteinase K (200 $\mu$ g/ml to 50  $\mu$ g/ml). The cells were then incubated for a further 24  
402 hours. Control wells were exposed to media without enzyme. After treatments, the biofilm was  
403 stained with crystal violet as described above. Results are presented as a percentage of the untreated  
404 control.

405  
406 ***Confocal laser scanning microscopy.*** Biofilms of *H. pylori* SS1 were prepared as described  
407 above using BB2, however, for confocal laser scanning microscopy (CLSM),  $\mu$ -Slide 8-  
408 well glass bottom chamber slides (ibidi, Germany) were used instead of 96-well microtiter  
409 plates. Three day-old biofilms were stained with FilmTracer™ FM<sup>®</sup>1–43 (Invitrogen), BOBO-3  
410 (Invitrogen), Filmtracer SYPRO Ruby biofilm matrix stain (Invitrogen), or FilmTracer  
411 LIVE/DEAD biofilm viability kit (Invitrogen) according to the manufacturer's instructions.  
412 Stained biofilms were visualized by CLSM with an LSM 5 Pascal laser-scanning microscope  
413 (Zeiss) and images were acquired using Imaris software (Bitplane). Biomass analysis of biofilm  
414 was carried using FM<sup>®</sup>1–43 stained z-stack images (0.1 $\mu$ m thickness) obtained by CLSM from  
415 randomly selected areas. The biomass of biofilms was determined using COMSTAT (63).

416 **RNA extraction and library construction.** Biofilms of *H. pylori* SS1 were grown in 6-well plates  
417 (Costar) in BB2 as above. After 3 days of incubation, media containing non-attached planktonic  
418 bacteria (the planktonic fraction) was removed by pipetting, the cells were harvested by  
419 centrifugation and washed twice with PBS. The attached bacteria, representing the biofilm  
420 fraction, were washed twice with PBS to remove any remaining planktonic cells. Attached cells  
421 were scrapped off the plate using cell scraper. Both planktonic and biofilm fractions were subject  
422 to total RNA extraction using Trizol Max bacterial enhancement kit (Ambion, Life Technology,  
423 Carlsbad, CA, USA) as described by the manufacturer. RNA was further purified and  
424 concentrated using an RNAeasy Kit (Qiagen). rRNA was removed using the RiboZero magnetic  
425 kit (Illumina). Sequencing libraries were generated using NEBNext Ultra™ Directional RNA  
426 library Prep Kit for Illumina (NEB, USA). cDNA library quality and amount was verified using  
427 Agilent Bioanalyzer 2100 system (Agilent technologies, CA, USA) and then sequenced using  
428 Illumina NextSeq Mid-Output (UC Davis Genome Center).

429  
430 **Transcriptomic analysis.** RNA-seq data were analyzed using CLC Genomics Workbench  
431 (Version 11.0, CLC Bio, Boston, MA, USA). After adapters were trimmed, forward and reverse  
432 sequenced reads generated for each growth state (biofilm vs planktonic; three biological  
433 replicates for each condition) were mapped against the SS1 reference genome (32) to quantify  
434 gene expression levels for each experimental condition. The expression value was measured in  
435 Reads per Kilobase Per Million Mapped Reads (RPKM). Genes were considered as differentially  
436 expressed when the log<sub>2</sub> (fold change) was above 1 and the *P*-value was lower than 0.05.

437

438 **Quantitative PCR.** To validate the RNA-seq data, we performed qPCR to quantify the  
439 transcription of four differentially expressed genes (two up-regulated genes and two down-  
440 regulated genes). The Fold change in gene expression was calculated after normalization of each  
441 gene with the constitutively expressed gene *gapB* (64). Primers used for this experiment are  
442 listed 5'-3' below: *gapB* forward: GCCTCTTGCACGACTAACGC; *gapB* reverse:  
443 CTTTGCTCACGCCGGTGCTT. *flgL* forward: CAGGCAGCTCATGGATGCGA; *flgL* reverse:  
444 CGCTGTGCAAGGCGTTTTGA; *hspR* forward: TAGGCGTGCACCCTCAAACC; *hspR*  
445 reverse: CGCCCGCTAGATTAACCCCC; *hcpC* forward: GGGTTTTGTGCTTGGGTGCG;  
446 *hcpC* reverse: TTCCACCCCCTGCCCTTGAT; *hslV* forward:  
447 GATTTGCCGGAAGCACTGCG; *hslV* reverse: ATCATCGCTTCCAGTCGGCG

448  
449 **Construction of *H. pylori* mutants.**

450 The SS1  $\Delta$ *fliM* mutant was created by natural transformation of SS1 wild type with plasmid  
451 pBS-*fliM*::*catmut* (40) which replaces most of the *fliM* gene, corresponding to amino acids 1-  
452 105, with *cat*. The G27 *motB* mutant was created by natural transformation of G27 wild type  
453 with plasmid pKO114K and selection for kanamycin resistance. pKO114K was made as  
454 described for pKO114i (65), but instead of insertion of a *aphA3-sacB* allele, only an *aphA3*  
455 allele was inserted. This allele inserts the *aphA3* at the position corresponding to amino acid 113  
456 of 257.

457 **Scanning electron microscopy.** *H. pylori* biofilms were grown on glass coverslips (12mm,  
458 Chemgalss, life Sciences, Vineland, NJ) by dispersing 4 mL of a culture diluted to OD 0.15 in  
459 BB2 into wells of a 6-well plate (Costar). The plate was incubated as described above. After  
460 three days of growth, biofilms formed on the surface of the coverslips and planktonic cells were  
461 washed twice with PBS and fixed with 2.5% glutaraldehyde (wt/vol) for 1 hour at room

462 temperature. Samples were then dehydrated with graded ethanol series, critically point dried,  
463 sputtered with ~20 nm of gold (Hammer IV, Technics Inc, Anaheim, CA) and imaged in  
464 an FEI Quanta 3D Dualbeam SEM operating at 5 kV and 6.7 pA.

465

466 *Statistical analysis.* Biofilms data were analyzed with GraphPad Prism (version 7.0) software  
467 (GraphPad Inc., San Diego, CA) using one-way analysis of variance (ANOVA) followed by  
468 Dunnett's multiple-comparison test.

469

470  
471  
472  
473  
474  
475  
476  
477  
478  
479  
480  
481  
482  
483  
484

## ACKNOWLEDGEMENTS

We thank Dr. Fitnat Yildiz (U.C. Santa Cruz) and Dr. Davide Roncarati (University of Bologna, Italy) for their helpful suggestions and comments on the study and the manuscript. We thank Aaron Clarke (U.C. Santa Cruz) for his assistance with portions of the SEM experiments. We thank Dr. Ben Abrams (U.C. Santa Cruz) for CLSM assistance. We also acknowledge Dr. Tom Yuzvinsky (U.C. Santa Cruz) for assistance with sample preparation and electron microscopy and the W.M. Keck Center for Nanoscale Optofluidics for use of the FEI Quanta 3D Dualbeam microscope. We also thank Dr. David Bernick and METX department (U.C. Santa Cruz) for holding and financially supporting the RNAseq workshop. The work described here was supported by National Institutes of Health National Institute of Allergy and Infectious Disease (NIAID) grant RO1AI116946 (to K.M.O.). The funders had no role in study design, data collection and interpretation, or the decision to submit the work for publication.



485 **FIGURES LEGENDS**

486

487 **FIG 1. *H. pylori* SS1 forms robust biofilms after 3 days of growth in BB2.** *H. pylori* strain  
488 SS1 was grown in the indicated media and biofilm formation was assessed by crystal violet  
489 absorbance at 595nm. (A) *H. pylori* SS1 was grown for 3 days in BB media supplemented with  
490 different concentration of FBS (BB10: 10%, BB6: 6% and BB2: 2%). (B) *H. pylori* SS1 was  
491 grown for 3 days in BB media or HAMS F12 supplemented with 10% or 2% of FBS. (C) *H.*  
492 *pylori* SS1 was grown in BB media supplemented with 2% FBS and biofilm formation was  
493 evaluated at different time points. Experiments were performed three independent times with at  
494 least 6 technical replicates for each. Statistical analysis was performed using ANOVA (\*,  $P <$   
495 0.05 and \*\*,  $P <$  0.01).

496

497 **FIG 2. Confocal scanning laser microscopy (CSLM) images of *H. pylori* SS1 biofilm.** Shown  
498 are representative CSLM images of 3 day-old SS1 biofilms grown in BB2 and stained with (A)  
499 FM 1-43 to stain total bacterial cells; (B) SYPRO RUBY to stain extracellular proteins, (C)  
500 BOBO-3 to stain extracellular DNA and (D-F) Live-Dead staining with live cells represented by  
501 the green-fluorescent SYTO 9, and dead/damaged cells by the red-fluorescent propidium. Scale  
502 bar = 30  $\mu$ m

503

504 **FIG 3. Effect of enzymatic treatments on pre-formed biofilms.** *H. pylori* SS1 was allowed to  
505 form biofilms for three days in BB2. The media was then removed and replaced with either fresh  
506 media or media containing DNase I or proteinase K. Cells were re-incubated for 24 hours, and  
507 then analyzed for remaining biofilm using the crystal violet assay. Data shown here represent the  
508 percentage of remaining of biofilm compared to the untreated control. Experiments were

509 performed three times independently with at least 8 technical replicates for each. Statistical  
510 analysis was performed using ANOVA \*,  $P < 0.01$  compared to the untreated control.

511

512 **FIG 4. Biofilm-grown cells and planktonic cells show distinct transcriptional profiles. (A)**

513 principal component analysis (PCA) of gene expression obtained by RNA-seq between biofilm

514 (n =3) and planktonic (n =3) populations. **(B)** Volcano plot of gene expression data. The y-axis is

515 the negative log<sub>10</sub> of P-values (a higher value indicates greater significance) and the x-axis is

516 log<sub>2</sub> fold change in difference in abundance between two population (positive values represent

517 the up-regulated genes in biofilm and negative values represent down-regulated genes). The

518 dashed red line shows where  $P = 0.01$ , with points above the line having  $P < 0.01$  and points

519 below the line having  $P > 0.01$ .

520

521 **FIG 5. Functional classification of genes differentially expression in *H. pylori* SS1 biofilm.**

522 Black and grey bars represent up-regulated and down-regulated genes, respectively that were

523 significantly differentially expressed ( $p < 0.01$  and log<sub>2</sub>-fold change  $> 1$  or  $< -1$ ) between *H. pylori*

524 biofilm and planktonic populations

525

526 **FIG 6. qPCR validation of the transcription of selected differentially expressed genes.** The

527 data indicate the fold-change expression of genes in *H. pylori* biofilm cells compared to

528 planktonic cells. Fold-change in gene expressions were calculated after normalization of each

529 gene with the constitutively expressed gene control *gapB*. Bars represent the mean and the error

530 bars the standard error of the mean, Black and grey bars represent qPCR and RNA-seq results,

531 respectively. Statistical analyses were performed using  $2^{-\Delta\Delta CT}$  values, and all results with an  
532 asterisk were statistically significant ( $P < 0.01$ ).

533

534 **FIG 7. Flagella play integral roles in *H. pylori* biofilms.** (A) Scanning electron microscope  
535 (SEM) images of biofilms formed by *H. pylori* wild-type SS1 (SS1 WT), isogenic non-motile but  
536 flagellated mutant  $\Delta motB$  (SS1  $\Delta motB$ ), and isogenic aflagellated mutant  $\Delta fliM$  (SS1  $\Delta fliM$ ).  
537 Arrows flagella. (B) Quantification of biofilm formation by *H. pylori* SS1 WT,  $\Delta motB$  and  
538  $\Delta fliM$ . Strains were grown in BB2 media for three days, followed by biofilm evaluation using the  
539 crystal violet assay. Experiments were performed three times independently with 6-9 technical  
540 replicates for each. Statistical analysis was performed using ANOVA (\*\*,  $P < 0.01$  and \*,  $P <$   
541 0.05).

542

543 **Fig 8. *H. pylori* G27 biofilm contain structurally important flagella.** (A) Scanning electron  
544 microscope (SEM) images of wild type G27 *H. pylori* biofilms. Arrows indicate flagella. (B)  
545 Quantification of biofilm formation by *H. pylori* G27 wild type (WT), non-motile flagellated  
546  $motB$ , non-motile mutant  $fliA$  that is reported to have either truncated flagella or no flagella, and  
547 the aflagellated and non-motile mutant  $flgS$ . Biofilms were evaluated using the crystal violet  
548 assay. Experiments were performed 2 times independently with at least 6 technical replicates for  
549 each. Statistical analysis was performed using ANOVA (\*\*,  $P < 0.01$  and \*,  $P < 0.05$ ).

550

551 **Supplementary Movie 1. Three-dimensional (3D) view of *H. pylori* biofilm grown for 3**  
552 **days.** Bacteria were stained with FilmTracer™ FM® 1–43 and observed by CLSM.

553 **REFERENCES**

- 554 1. **Moodley Y, Linz B, Bond RP, Nieuwoudt M, Soodyall H, Schlebusch CM, Bernhoft**  
555 **S, Hale J, Suerbaum S, Mugisha L, van der Merwe SW, Achtman M.** 2012. Age of  
556 the association between *Helicobacter pylori* and man. PLoS Pathog **8**:e1002693.
- 557 2. **Salama NR, Hartung ML, Muller A.** 2013. Life in the human stomach: persistence  
558 strategies of the bacterial pathogen *Helicobacter pylori*. Nat Rev Microbiol **11**:385-399.
- 559 3. **Schreiber S, Konradt M, Groll C, Scheid P, Hanauer G, Werling HO, Josenhans C,**  
560 **Suerbaum S.** 2004. The spatial orientation of *Helicobacter pylori* in the gastric mucus.  
561 Proc Natl Acad Sci U S A **101**:5024-5029.
- 562 4. **Keilberg D, Zavros Y, Shepherd B, Salama NR, Ottemann KM.** 2016. Spatial and  
563 temporal shifts in bacterial biogeography and gland occupation during the development  
564 of a chronic infection. MBio **7**.
- 565 5. **Howitt MR, Lee JY, Lertsethtakarn P, Vogelmann R, Joubert LM, Ottemann KM,**  
566 **Amieva MR.** 2011. ChePep controls *Helicobacter pylori* infection of the gastric glands  
567 and chemotaxis in the Epsilonproteobacteria. MBio **2**.
- 568 6. **Hu Q, Zhang Y, Zhang X, Fu K.** 2016. Gastric mucosa-associated lymphoid tissue  
569 lymphoma and *Helicobacter pylori* infection: a review of current diagnosis and  
570 management. Biomark Res **4**:15.
- 571 7. **Kim SY, Choi DJ, Chung JW.** 2015. Antibiotic treatment for *Helicobacter pylori*: Is the  
572 end coming? World J Gastrointest Pharmacol Ther **6**:183-198.
- 573 8. **Parkin DM.** 2006. The global health burden of infection-associated cancers in the year  
574 2002. Int J Cancer **118**:3030-3044.
- 575 9. **Choi IJ, Kook MC, Kim YI, Cho SJ, Lee JY, Kim CG, Park B, Nam BH.** 2018.  
576 *Helicobacter pylori* therapy for the prevention of metachronous gastric Cancer. N Engl J  
577 Med **378**:1085-1095.
- 578 10. **Keilberg D, Ottemann KM.** 2016. How *Helicobacter pylori* senses, targets and interacts  
579 with the gastric epithelium. Environ Microbiol **18**:791-806.
- 580 11. **Celli JP, Turner BS, Afdhal NH, Keates S, Ghiran I, Kelly CP, Ewoldt RH,**  
581 **McKinley GH, So P, Erramilli S, Bansil R.** 2009. *Helicobacter pylori* moves through  
582 mucus by reducing mucin viscoelasticity. Proc Natl Acad Sci U S A **106**:14321-14326.

- 583 12. **Tan S, Tompkins LS, Amieva MR.** 2009. *Helicobacter pylori* usurps cell polarity to  
584 turn the cell surface into a replicative niche. PLoS Pathog **5**:e1000407.
- 585 13. **Anderson JK, Huang JY, Wreden C, Sweeney EG, Goers J, Remington SJ,**  
586 **Guillemin K.** 2015. Chemorepulsion from the quorum signal autoinducer-2 promotes  
587 *Helicobacter pylori* biofilm dispersal. MBio **6**:e00379.
- 588 14. **Flemming HC, Wingender J.** 2010. The biofilm matrix. Nat Rev Microbiol **8**:623-633.
- 589 15. **Hathroubi S, Mekni MA, Domenico P, Nguyen D, Jacques M.** 2017. Biofilms:  
590 Microbial shelters against antibiotics. Microb Drug Resist **23**:147-156.
- 591 16. **Sapi E, Balasubramanian K, Poruri A, Maghsoudlou JS, Socarras KM, Timmaraju**  
592 **AV, Filush KR, Gupta K, Shaikh S, Theophilus PA, Luecke DF, MacDonald A,**  
593 **Zelger B.** 2016. Evidence of *in Vivo* existence of Borrelia biofilm in Borrelial  
594 lymphocytomas. Eur J Microbiol Immunol (Bp) **6**:9-24.
- 595 17. **Boisvert AA, Cheng MP, Sheppard DC, Nguyen D.** 2016. Microbial biofilms in  
596 pulmonary and critical care diseases. Ann Am Thorac Soc **13**:1615-1623.
- 597 18. **Hall-Stoodley L, Hu FZ, Gieseke A, Nistico L, Nguyen D, Hayes J, Forbes M,**  
598 **Greenberg DP, Dice B, Burrows A, Wackym PA, Stoodley P, Post JC, Ehrlich GD,**  
599 **Kerschner JE.** 2006. Direct detection of bacterial biofilms on the middle-ear mucosa of  
600 children with chronic otitis media. JAMA **296**:202-211.
- 601 19. **Vakil N, Vaira D.** 2013. Treatment for *H. pylori* infection: new challenges with  
602 antimicrobial resistance. J Clin Gastroenterol **47**:383-388.
- 603 20. **Hathroubi S, Servetas SL, Windham I, Merrell DS, Ottemann KM.** 2018.  
604 *Helicobacter pylori* biofilm formation and its potential role in pathogenesis. Microbiol  
605 Mol Biol Rev **82**.
- 606 21. **Carron MA, Tran VR, Sugawa C, Coticchia JM.** 2006. Identification of *Helicobacter*  
607 *pylori* biofilms in human gastric mucosa. J Gastrointest Surg **10**:712-717.
- 608 22. **Coticchia JM, Sugawa C, Tran VR, Gurrola J, Kowalski E, Carron MA.** 2006.  
609 Presence and density of *Helicobacter pylori* biofilms in human gastric mucosa in patients  
610 with peptic ulcer disease. J Gastrointest Surg **10**:883-889.
- 611 23. **Cole SP, Harwood J, Lee R, She R, Guiney DG.** 2004. Characterization of  
612 monospecies biofilm formation by *Helicobacter pylori*. J Bacteriol **186**:3124-3132.

- 613 24. **Windham IH, Servetas SL, Whitmire JM, Pletzer D, Hancock REW, Merrell DS.**  
614 2018. *Helicobacter pylori* biofilm formation is differentially affected by common Culture  
615 conditions, and proteins play a central role in the biofilm Matrix. *Appl Environ Microbiol*  
616 **84**.
- 617 25. **Yang FL, Hassanbhai AM, Chen HY, Huang ZY, Lin TL, Wu SH, Ho B.** 2011.  
618 Proteomannans in biofilm of *Helicobacter pylori* ATCC 43504. *Helicobacter* **16**:89-98.
- 619 26. **Yonezawa H, Osaki T, Hanawa T, Kurata S, Ochiai K, Kamiya S.** 2013. Impact of  
620 *Helicobacter pylori* biofilm formation on clarithromycin susceptibility and generation of  
621 resistance mutations. *PLoS One* **8**:e73301.
- 622 27. **Bessa LJ, Grande R, Di Iorio D, Di Giulio M, Di Campli E, Cellini L.** 2013.  
623 *Helicobacter pylori* free-living and biofilm modes of growth: behavior in response to  
624 different culture media. *APMIS* **121**:549-560.
- 625 28. **Williams JC, McInnis KA, Testerman TL.** 2008. Adherence of *Helicobacter pylori* to  
626 abiotic surfaces is influenced by serum. *Appl Environ Microbiol* **74**:1255-1258.
- 627 29. **Hathroubi S, Hancock MA, Bosse JT, Langford PR, Tremblay YD, Labrie J,  
628 Jacques M.** 2015. Surface polysaccharide mutants reveal that absence of O antigen  
629 reduces biofilm formation of *Actinobacillus pleuropneumoniae*. *Infect Immun* **84**:127-  
630 137.
- 631 30. **Vogeleer P, Tremblay YDN, Jubelin G, Jacques M, Harel J.** 2015. Biofilm-forming  
632 abilities of shiga toxin-producing *Escherichia coli* isolates associated with human  
633 infections. *Appl Environ Microbiol* **82**:1448-1458.
- 634 31. **Grande R, Di Giulio M, Bessa LJ, Di Campli E, Baffoni M, Guarnieri S, Cellini L.**  
635 2011. Extracellular DNA in *Helicobacter pylori* biofilm: a backstairs rumour. *J Appl*  
636 *Microbiol* **110**:490-498.
- 637 32. **Draper JL, Hansen LM, Bernick DL, Abedrabbo S, Underwood JG, Kong N,  
638 Huang BC, Weis AM, Weimer BC, van Vliet AH, Pourmand N, Solnick JV, Karplus  
639 K, Ottemann KM.** 2017. Fallacy of the unique genome: Sequence diversity within  
640 single *Helicobacter pylori* strains. *MBio* **8**.
- 641 33. **Wang G, Maier RJ.** 2015. A novel DNA-binding protein plays an important role in  
642 *Helicobacter pylori* stress tolerance and survival in the host. *J Bacteriol* **197**:973-982.

- 643 34. **Hong SH, Lee J, Wood TK.** 2010. Engineering global regulator Hha of *Escherichia coli*  
644 to control biofilm dispersal. *Microb Biotechnol* **3**:717-728.
- 645 35. **Formichella L, Romberg L, Bolz C, Vieth M, Geppert M, Gottner G, Nolting C,**  
646 **Walter D, Schepp W, Schneider A, Ulm K, Wolf P, Busch DH, Soutschek E,**  
647 **Gerhard M.** 2013. A novel line immunoassay based on recombinant virulence factors  
648 enables highly specific and sensitive serologic diagnosis of *Helicobacter pylori* infection.  
649 *Clin Vaccine Immunol* **20**:1703-1710.
- 650 36. **Zhao Y, Yokota K, Ayada K, Yamamoto Y, Okada T, Shen L, Oguma K.** 2007.  
651 *Helicobacter pylori* heat-shock protein 60 induces interleukin-8 via a Toll-like receptor  
652 (TLR)2 and mitogen-activated protein (MAP) kinase pathway in human monocytes. *J*  
653 *Med Microbiol* **56**:154-164.
- 654 37. **Kusters JG, van Vliet AH, Kuipers EJ.** 2006. Pathogenesis of *Helicobacter pylori*  
655 infection. *Clin Microbiol Rev* **19**:449-490.
- 656 38. **Ta LH, Hansen LM, Sause WE, Shiva O, Millstein A, Ottemann KM, Castillo AR,**  
657 **Solnick JV.** 2012. Conserved transcriptional unit organization of the *cag* pathogenicity  
658 island among *Helicobacter pylori* strains. *Front Cell Inf Microbio* **2**, 46
- 659 39. **Backert S, Tegtmeyer N, Fischer W.** 2015. Composition, structure and function of the  
660 *Helicobacter pylori* *cag* pathogenicity island encoded type IV secretion system. *Future*  
661 *Microbiol* **10**, 955–965.
- 662 40. **O'Rourke J, Bode G.** 2001. Morphology and ultrastructure. *In* Mobley HLT, Mendz GL,  
663 Hazell SL (ed), *Helicobacter pylori: Physiology and genetics*, Washington (DC).
- 664 41. **Lowenthal AC, Hill M, Sycuro LK, Mehmood K, Salama NR, Ottemann KM.** 2009.  
665 Functional analysis of the *Helicobacter pylori* flagellar switch proteins. *J Bacteriol*  
666 **191**:7147-7156.
- 667 42. **Sauer K, Camper AK, Ehrlich GD, Costerton JW, Davies DG.** 2002. *Pseudomonas*  
668 *aeruginosa* displays multiple phenotypes during development as a biofilm. *J Bacteriol*  
669 **184**:1140-1154.
- 670 43. **Whiteley M, Bangera MG, Bumgarner RE, Parsek MR, Teitzel GM, Lory S,**  
671 **Greenberg EP.** 2001. Gene expression in *Pseudomonas aeruginosa* biofilms. *Nature*  
672 **413**:860-864.

- 673 44. **Guttenplan SB, Kearns DB.** 2013. Regulation of flagellar motility during biofilm  
674 formation. *FEMS Microbiol Rev* **37**:849-871.
- 675 45. **Romero-Lastra P, Sanchez MC, Ribeiro-Vidal H, Llama-Palacios A, Figuero E,**  
676 **Herrera D, Sanz M.** 2017. Comparative gene expression analysis of *Porphyromonas*  
677 *gingivalis* ATCC 33277 in planktonic and biofilms states. *PLoS One* **12**:e0174669.
- 678 46. **Beloin C, Valle J, Latour-Lambert P, Faure P, Kzreminski M, Balestrino D,**  
679 **Haagensen JA, Molin S, Prensier G, Arbeille B, Ghigo JM.** 2004. Global impact of  
680 mature biofilm lifestyle on *Escherichia coli* K-12 gene expression. *Mol Microbiol*  
681 **51**:659-674.
- 682 47. **Josenhans C, Niehus E, Amersbach S, Horster A, Betz C, Drescher B, Hughes KT,**  
683 **Suerbaum S.** 2002. Functional characterization of the antagonistic flagellar late  
684 regulators FliA and FlgM of *Helicobacter pylori* and their effects on the *H. pylori*  
685 transcriptome. *Mol Microbiol* **43**:307-322.
- 686 48. **Charlebois A, Jacques M, Archambault M.** 2016. Comparative transcriptomic analysis  
687 of *Clostridium perfringens* biofilms and planktonic cells. *Avian Pathol* **45**:593-601.
- 688 49. **Domka J, Lee J, Bansal T, Wood TK.** 2007. Temporal gene-expression in *Escherichia*  
689 *coli* K-12 biofilms. *Environ Microbiol* **9**:332-346.
- 690 50. **Serra DO, Richter AM, Klauck G, Mika F, Hengge R.** 2013. Microanatomy at cellular  
691 resolution and spatial order of physiological differentiation in a bacterial biofilm. *MBio*  
692 **4**:e00103-00113.
- 693 51. **Hung C, Zhou Y, Pinkner JS, Dodson KW, Crowley JR, Heuser J, Chapman MR,**  
694 **Hadjifrangiskou M, Henderson JP, Hultgren SJ.** 2013. *Escherichia coli* biofilms have  
695 an organized and complex extracellular matrix structure. *MBio* **4**:e00645-00613.
- 696 52. **Roncarati D, Danielli A, Spohn G, Delany I, Scarlato V.** 2007. Transcriptional  
697 regulation of stress response and motility functions in *Helicobacter pylori* is mediated by  
698 HspR and HrcA. *J Bacteriol* **189**:7234-7243.
- 699 53. **Spohn G, Scarlato V.** 1999. The autoregulatory HspR repressor protein governs  
700 chaperone gene transcription in *Helicobacter pylori*. *Mol Microbiol* **34**:663-674.
- 701 54. **Spohn G, Danielli A, Roncarati D, Delany I, Rappuoli R, Scarlato V.** 2004. Dual  
702 control of *Helicobacter pylori* heat shock gene transcription by HspR and HrcA. *J*  
703 *Bacteriol* **186**:2956-2965.



- 704 55. **Wang G, Lo LF, Maier RJ.** 2011. The RecRO pathway of DNA recombinational repair  
705 in *Helicobacter pylori* and its role in bacterial survival in the host. *DNA Repair (Amst)*  
706 **10:373-379.**
- 707 56. **Wang G, Maier SE, Lo LF, Maier G, Dosi S, Maier RJ.** 2010. Peptidoglycan  
708 deacetylation in *Helicobacter pylori* contributes to bacterial survival by mitigating host  
709 immune responses. *Infect Immun* **78:4660-4666.**
- 710 57. **Schembri MA, Kjaergaard K, Klemm P.** 2003. Global gene expression in *Escherichia*  
711 *coli* biofilms. *Mol Microbiol* **48:253-267.**
- 712 58. **Falsetta ML, Steichen CT, McEwan AG, Cho C, Ketterer M, Shao J, Hunt J,**  
713 **Jennings MP, Apicella MA.** 2011. The Composition and Metabolic Phenotype of  
714 *Neisseria gonorrhoeae* Biofilms. *Front Microbiol* **2:75.**
- 715 59. **Castro J, Franca A, Bradwell KR, Serrano MG, Jefferson KK, Cerca N.** 2017.  
716 Comparative transcriptomic analysis of *Gardnerella vaginalis* biofilms vs. planktonic  
717 cultures using RNA-seq. *NPJ Biofilms Microbiomes* **3:3.**
- 718 60. **Hauser R, Pech M, Kijek J, Yamamoto H, Titz B, Naeve F, Tovchigrechko A,**  
719 **Yamamoto K, Szaflarski W, Takeuchi N, Stellberger T, Diefenbacher ME, Nierhaus**  
720 **KH, Uetz P.** 2012. RsfA (YbeB) proteins are conserved ribosomal silencing factors.  
721 *PLoS Genet* **8:e1002815.**
- 722 61. **Bugli F, Palmieri V, Torelli R, Papi M, De Spirito M, Cacaci M, Galgano S, Masucci**  
723 **L, Paroni Sterbini F, Vella A, Graffeo R, Posteraro B, Sanguinetti M.** 2016. *In vitro*  
724 effect of clarithromycin and alginate lyase against *Helicobacter pylori* biofilm.  
725 *Biotechnol Prog* **32:1584-1591.**
- 726 62. **Lee A, O'Rourke J, De Ungria MC, Robertson B, Daskalopoulos G, Dixon MF.**  
727 1997. A standardized mouse model of *Helicobacter pylori* infection: introducing the  
728 Sydney strain. *Gastroenterology* **112:1386-1397.**
- 729 63. **Heydorn A, Nielsen AT, Hentzer M, Sternberg C, Givskov M, Ersboll BK, Molin S.**  
730 2000. Quantification of biofilm structures by the novel computer program COMSTAT.  
731 *Microbiol* **146 ( Pt 10):2395-2407.**
- 732 64. **Collins KD, Hu S, Grasberger H, Kao JY, Ottemann KM.** 2018. Chemotaxis allows  
733 bacteria to overcome host-generated reactive oxygen species that constrain gland  
734 colonization. *Infect Immun* doi:10.1128/IAI.00878-17.

- 735 65. **Ottemann KM, Lowenthal AC.** 2002. *Helicobacter pylori* uses motility for initial  
736 colonization and to attain robust infection. *Infect Immun* **70**:1984-1990.
- 737 66. **Censini S, Lange C, Xiang Z, Crabtree JE, Ghiara P, Borodovsky M, Rappuoli R,**  
738 **Covacci A.** 1996. *cag*, a pathogenicity island of *Helicobacter pylori*, encodes type I-  
739 specific and disease-associated virulence factors. *Proc Natl Acad Sci U S A* **93**:14648-  
740 14653.
- 741 67. **Salama NR, Shepherd B, Falkow S.** 2004. Global transposon mutagenesis and essential  
742 gene analysis of *Helicobacter pylori*. *J Bacteriol* **186**:7926-7935.

743 **Table 1. Strains used in this study.**

744

| <i>H. pylori</i> strain  | KO Strain number | Description/genotype      | Reference/source                                                |
|--------------------------|------------------|---------------------------|-----------------------------------------------------------------|
| SS1 WT                   |                  | Wild-type strain          | (62)/ J. O'Rourke                                               |
| SS1 $\Delta$ <i>fliM</i> | KO1064           | $\Delta$ <i>fliM::cat</i> | This study (allele published in (41))                           |
| SS1 $\Delta$ <i>motB</i> | KO536            | $\Delta$ <i>motB2</i>     | (65)                                                            |
| G27 WT                   |                  | Wild-type strain          | (66)/ N. Salama, Fred Hutchison Cancer Research Center, Seattle |
| G27 <i>motB</i>          | KO493            | <i>motB::aphA3</i>        | This study                                                      |
| G27 <i>flgS</i>          | KO688            | <i>flgS::TnCat</i>        | (67)                                                            |
| G27 <i>fliA</i>          | KO689            | <i>fliA::TnCat</i>        | (67)                                                            |

745

746 **Table 2. Up-regulated gene in *H. pylori* SS1 biofilm (cutoff ratio  $\geq 1$  log2 fold change and p-value  $<0.05$ ) using RNA-seq**  
747 **analysis, grouped by functional role categories.** Fold change represents the difference in gene expression between biofilm (n =3)  
748 and planktonic (n =3) populations.  
749  
750

| <b>Locus Name</b>            | <b>Putative identification</b>                           | <b>Fold Change</b> |
|------------------------------|----------------------------------------------------------|--------------------|
| <b>Cell envelope</b>         |                                                          |                    |
| <i>flgL</i> (HPYLSS1_00284)  | Flagellar hook-associated protein 3                      | 7.64               |
| <i>flgK</i> (HPYLSS1_01062)  | flagellar hook-associated protein 1                      | 6.16               |
| <i>flgM</i> (HPYLSS1_01066)  | Anti-sigma-28 factor                                     | 3.94               |
| <i>flaG</i> (HPYLSS1_00586)  | Polar flagellin G                                        | 3.93               |
| <i>flaB</i> (HPYLSS1_00110)  | Flagellin B                                              | 3.52               |
| <i>flgE1</i> (HPYLSS1_00464) | Flagellar hook protein 1                                 | 3.07               |
| <i>flgB</i> (HPYLSS1_01503)  | Flagellar basal body rod protein                         | 2.37               |
| <i>fliL</i> (HPYLSS1_00526)  | Flagellar protein of unknown function                    | 2.25               |
| <i>fliK</i> (HPYLSS1_00653)  | Flagellar hook-length control protein                    | 2.14               |
| <i>fliD</i> (HPYLSS1_00585)  | Flagellar hook-associated protein 2                      | 2                  |
| <i>lpxB</i> (HPYLSS1_00467)  | Lipid-A-disaccharide synthase                            | 3.06               |
| <i>lptB</i> (HPYLSS1_00622)  | Lipopolysaccharide export system ATP-binding             | 2.54               |
| <i>mltD</i> (HPYLSS1_01517)  | Membrane-bound lytic murein transglycosylase D precursor | 2                  |
| <i>pgdA</i> (HPYLSS1_00299)  | Peptidoglycan deacetylase                                | 2.1                |
| HPYLSS1_00450                | Membrane protein                                         | 3.78               |
| HPYLSS1_01378                | Outer membrane protein <i>homD</i>                       | 3.26               |
| HPYLSS1_01113                | Putative outer membrane protein                          | 2.91               |
| HPYLSS1_01021                | Outer membrane protein <i>homC</i>                       | 2.69               |
| HPYLSS1_01469                | Putative outer membrane protein                          | 2.52               |
| <b>Cellular process</b>      |                                                          |                    |

|                                                                  |                                                     |      |
|------------------------------------------------------------------|-----------------------------------------------------|------|
| <i>cagE</i> (HPYLSS1_00705)                                      | Type IV secretion system protein virB4/DNA transfer | 2.46 |
| <i>cagW</i> (HPYLSS1_00718)                                      | CAG pathogenicity island protein CagW (cag10)       | 2.31 |
| <i>cagL</i> (HPYLSS1_00710)                                      | CAG pathogenicity island protein CagL (cag18)       | 2.02 |
| <i>recR</i> (HPYLSS1_00636)                                      | Recombination protein RecR                          | 3.7  |
| <b>HPYLSS1_00410</b>                                             | DNA polymerase I                                    | 2.08 |
| <b>HPYLSS1_01332</b>                                             | CMP-N-acetylneuraminate-beta-galactosamide-         | 2.2  |
| <b>Regulatory functions</b>                                      |                                                     |      |
| <i>hrcA</i> (HPYLSS1_00106)                                      | Heat-inducible transcription repressor HrcA         | 4.84 |
| <i>hspR</i> (HPYLSS1_00407)                                      | Putative heat shock protein HspR                    | 2.09 |
| <i>crdR</i> (HPYLSS1_01312)                                      | Two component response regulator CrdR               | 2.03 |
| <i>rsfS</i> (HPYLSS1_01340)                                      | Ribosomal silencing factor S                        | 2.16 |
| <b>Translation</b>                                               |                                                     |      |
| <i>ansA</i> (HPYLSS1_00615)                                      | Putative L-asparaginase                             | 2.11 |
| <i>cbpA</i> (HPYLSS1_00408)                                      | Curved DNA-binding protein                          | 2.19 |
| <b>HPYLSS1_00252</b>                                             | Chaperone protein ClpB                              | 2.7  |
| <b>HPYLSS1_01332</b>                                             | CMP-N-acetylneuraminate-beta-galactosamide          | 2.2  |
| <b>Amino acid biosynthesis</b>                                   |                                                     |      |
| <i>porC</i> (HPYLSS1_01050)                                      | Pyruvate synthase subunit PorC                      | 2.02 |
| <b>Fatty acid and phospholipid metabolism</b>                    |                                                     |      |
| <i>acpS</i> (HPYLSS1_00527)                                      | Holo-[acyl-carrier-protein] synthase                | 2.89 |
| <i>fenF</i> (HPYLSS1_00085)                                      | Malonyl CoA-acyl carrier protein transacylase       | 2.26 |
| <b>Biosynthetic of cofactors, prosthetic groups and carriers</b> |                                                     |      |
| <i>thiE</i> (HPYLSS1_00492)                                      | Thiamine-phosphate synthase                         | 4.13 |
| <i>salL</i> (HPYLSS1_00914)                                      | Adenosyl-chloride synthase                          | 2.87 |
| <b>DNA restriction, modification, recombination, and repair</b>  |                                                     |      |

|                                       |                                                |       |
|---------------------------------------|------------------------------------------------|-------|
| <b>HPYLSS1_00696</b>                  | Restriction endonuclease                       | 2.19  |
| <b>Transport and binding proteins</b> |                                                |       |
| <i>metI</i> (HPYLSS1_01522)           | D-methionine transport system permease protein | 2.18  |
| <b>HPYLSS1_00805</b>                  | Putative ABC transporter ATP-binding protein   | 2.02  |
| <b>Energy metabolism</b>              |                                                |       |
| <i>ansA</i> (HPYLSS1_00615)           | Putative L-asparaginase                        | 2.11  |
| <b>HPYLSS1_00772</b>                  | Pyrrroquinoline quinone biosynthesis protein   | 7.5   |
| <b>Hypothetical proteins</b>          |                                                |       |
| <b>HPYLSS1_00605</b>                  | hypothetical protein/Putative GTPase dynamin   | 17.63 |
| <b>HPYLSS1_00355</b>                  | Hypothetical protein                           | 7.82  |
| <b>HPYLSS1_01063</b>                  | Hypothetical protein                           | 7.58  |
| <b>HPYLSS1_00488</b>                  | Hypothetical protein                           | 5.65  |
| <b>HPYLSS1_01091</b>                  | Hypothetical protein                           | 5.34  |
| <b>HPYLSS1_00197</b>                  | Hypothetical protein                           | 4.4   |
| <b>HPYLSS1_00109</b>                  | Hypothetical protein                           | 4.25  |
| <b>HPYLSS1_00933</b>                  | Hypothetical protein                           | 3.91  |
| <b>HPYLSS1_01183</b>                  | Hypothetical protein                           | 3.37  |
| <b>HPYLSS1_00583</b>                  | Hypothetical protein                           | 3.07  |
| <b>HPYLSS1_00404</b>                  | Hypothetical protein                           | 2.85  |
| <b>HPYLSS1_01474</b>                  | Hypothetical protein                           | 2.77  |
| <b>HPYLSS1_00984</b>                  | Hypothetical protein                           | 2.56  |
| <b>HPYLSS1_01009</b>                  | Hypothetical protein                           | 2.26  |
| <b>HPYLSS1_01271</b>                  | Hypothetical protein                           | 2.05  |
| <b>HPYLSS1_00558</b>                  | Hypothetical protein                           | 2.04  |
| <b>HPYLSS1_01019</b>                  | Hypothetical protein                           | 2.03  |
| <b>HPYLSS1_00777</b>                  | Hypothetical protein                           | 2.01  |
| <b>HPYLSS1_00529</b>                  | Hypothetical protein                           | 2     |

751  
752  
753

754

755 **Table 3. Down-regulated genes in *H. pylori* SS1 biofilm (cutoff ratio  $\leq -1 \log_2$  fold change and p-value  $<0.05$ ) using RNA-seq**  
 756 **analysis, grouped by functional role categories.**

757

758

| Locus Name                    | Putative identification                       | Fold Change |
|-------------------------------|-----------------------------------------------|-------------|
| <b>Cell envelope</b>          |                                               |             |
| <i>murB</i> (HPYLSS1_01344)   | UDP-N-acetylenolpyruvoylglucosamine reductase | -2.52       |
| <i>fliM</i> (HPYLSS1_00401)   | Flagellar motor switch protein FliM           | -2.25       |
| <i>fliI</i> (HPYLSS1_01346)   | Flagellum-specific ATP synthase               | -2.16       |
| <i>yohD-1</i> (HPYLSS1_00775) | Inner membrane protein YohD                   | -2.14       |
| <b>Cellular process</b>       |                                               |             |
| <i>mreB</i> (HPYLSS1_01316)   | Rod shape-determining protein MreB            | -2.95       |
| <i>urea</i> (HPYLSS1_00068)   | Urease subunit alpha                          | -2.28       |
| <i>groEL</i> (HPYLSS1_00013)  | 60 kDa chaperonin                             | -2.17       |
| <i>hcpC</i> (HPYLSS1_01039)   | Cysteine rich protein HcpC                    | -3.78       |
| <i>cmmA</i> (HPYLSS1_01486)   | Polymer-forming cytoskeletal family protein   | -2.58       |
| <i>typA</i> (HPYLSS1_00442)   | GTP-binding protein                           | -2.02       |
| <b>Regulatory functions</b>   |                                               |             |
| <i>hslV</i> (HPYLSS1_00733)   | ATP-dependent protease subunit                | -3.33       |
| HPYLSS1_00758                 | Putative TrmH family tRNA/rRNA                | -2.24       |
| <b>Translation</b>            |                                               |             |
| <i>rplR</i> (HPYLSS1_01253)   | 50S ribosomal protein L18                     | -3.09       |
| <i>rpsE</i> (HPYLSS1_01252)   | 30S ribosomal protein S5                      | -3.06       |
| <i>rpsG</i> (HPYLSS1_01140)   | 30S ribosomal protein S7                      | -2.52       |
| <i>rpsC</i> (HPYLSS1_01262)   | 30S ribosomal protein S3                      | -2.49       |
| <i>rpsK</i> (HPYLSS1_01246)   | 30S ribosomal protein S11                     | -2.44       |
| <i>rplW</i> (HPYLSS1_01266)   | 50S ribosomal protein L23                     | -2.29       |
| <i>rplN</i> (HPYLSS1_01258)   | 50S ribosomal protein L14                     | -2.29       |
| <i>rplD</i> (HPYLSS1_01267)   | 50S ribosomal protein L4                      | -2.23       |

|                                                                  |                                                                     |       |
|------------------------------------------------------------------|---------------------------------------------------------------------|-------|
| <i>rplB</i> (HPYLSS1_01265)                                      | 50S ribosomal protein L2                                            | -2.22 |
| <i>rplF</i> (HPYLSS1_01254)                                      | 50S ribosomal protein L6                                            | -2.21 |
| <i>rpmF</i> (HPYLSS1_00189)                                      | 50S ribosomal protein L32                                           | -2.14 |
| <i>rpsD</i> (HPYLSS1_01245)                                      | 30S ribosomal protein S4                                            | -2.12 |
| <i>rplS</i> (HPYLSS1_01093)                                      | 50S ribosomal protein L19                                           | -2.09 |
| <i>rplE</i> (HPYLSS1_01256)                                      | 50S ribosomal protein L5                                            | -2.07 |
| <i>rplV</i> (HPYLSS1_01263)                                      | 50S ribosomal protein L22                                           | -2.02 |
| <i>rpmG</i> (HPYLSS1_01151)                                      | 50S ribosomal protein L33                                           | -2.02 |
| <i>fusA</i> (HPYLSS1_01139)                                      | Elongation factor G                                                 | -2.23 |
| <i>tufa</i> (HPYLSS1_01152)                                      | Elongation factor Tu                                                | -2.14 |
| <i>yigZ</i> (HPYLSS1_01411)                                      | Elongation factor                                                   | -2.05 |
| <b>Amino acid biosynthesis</b>                                   |                                                                     |       |
| <i>trpB</i> (HPYLSS1_01240)                                      | Tryptophan synthase beta chain                                      | -2.68 |
| <b>Fatty acid and phospholipid metabolism</b>                    |                                                                     |       |
| <i>acpP_2</i> (HPYLSS1_00944)                                    | Acyl carrier protein                                                | -2.96 |
| <i>plsX</i> (HPYLSS1_00190)                                      | Phosphate acyltransferase                                           | -2.71 |
| <i>scoB</i> (HPYLSS1_00895)                                      | 3-Oxoacid CoA-transferase, subunit B                                | -2.11 |
| <b>Biosynthetic of cofactors, prosthetic groups and carriers</b> |                                                                     |       |
| <i>birA</i> (HPYLSS1_01084)                                      | Bifunctional ligase/repressor BirA                                  | -3.29 |
| <i>ribH</i> (HPYLSS1_00002)                                      | 6,7-dimethyl-8-ribityllumazine synthase                             | -2.47 |
| <i>folK</i> (HPYLSS1_00396)                                      | 2-amino-4-hydroxy-6-hydroxymethyldihydropteridine pyrophosphokinase | -2.13 |
| <i>ggt</i> (HPYLSS1_01061)                                       | Gamma-glutamyl transpeptidase                                       | -2.06 |
| <b>DNA restriction, modification, recombination, and repair</b>  |                                                                     |       |
| HPYLSS1_00145                                                    | Recombinase A                                                       | -2.46 |
| <b>Energy metabolism</b>                                         |                                                                     |       |
| <i>atpC</i> (HPYLSS1_01075)                                      | ATP synthase epsilon chain                                          | -2.78 |
| <i>atpE</i> (HPYLSS1_01164)                                      | ATP synthase subunit c                                              | -2.48 |
| <i>nifU</i> (HPYLSS1_00210)                                      | NifU-like protein                                                   | -2.15 |
| <i>adhA</i> (HPYLSS1_00)                                         | Alcohol dehydrogenase                                               | -2.12 |
| <i>mdaB</i> (HPYLSS1_00836)                                      | Modulator of drug activity B                                        | -2.05 |
| <b>Purine, pyrimidine, nucleosides and nucleotide</b>            |                                                                     |       |
| <i>pyrD_2</i> (HPYLSS1_01468)                                    | Dihydroorotate dehydrogenase B (NAD(+)), catalytic subunit          | -2.13 |



| <b>Hypothetical proteins</b> |                                                           |       |
|------------------------------|-----------------------------------------------------------|-------|
| <b>HPYLSS1_00188</b>         | Hypothetical protein                                      | -3.92 |
| <b>HPYLSS1_00885</b>         | Hypothetical protein                                      | -3.15 |
| <b>HPYLSS1_00325</b>         | Hypothetical protein/Putative beta-lactamase              | -2.95 |
| <b>HPYLSS1_00036</b>         | Hypothetical protein/Putative Nucleoid-associated protein | -2.79 |
| <b>HPYLSS1_01458</b>         | Hypothetical protein                                      | -2.79 |
| <b>HPYLSS1_01225</b>         | Hypothetical protein                                      | -2.71 |
| <b>HPYLSS1_00259</b>         | Hypothetical protein                                      | -2.66 |
| <b>HPYLSS1_01321</b>         | Hypothetical protein                                      | -2.44 |
| <b>HPYLSS1_01060</b>         | Hypothetical protein                                      | -2.32 |
| <b>HPYLSS1_00657</b>         | Hypothetical protein                                      | -2.27 |
| <b>HPYLSS1_01143</b>         | Hypothetical protein                                      | -2.21 |
| <b>HPYLSS1_00296</b>         | Hypothetical protein/Putative FOF1-ATPase subunit         | -2.2  |
| <b>HPYLSS1_00945</b>         | Hypothetical protein                                      | -2.16 |
| <b>HPYLSS1_00057</b>         | Hypothetical protein                                      | -2.03 |
| <b>HPYLSS1_00569</b>         | Hypothetical protein                                      | -2.07 |

759



**A**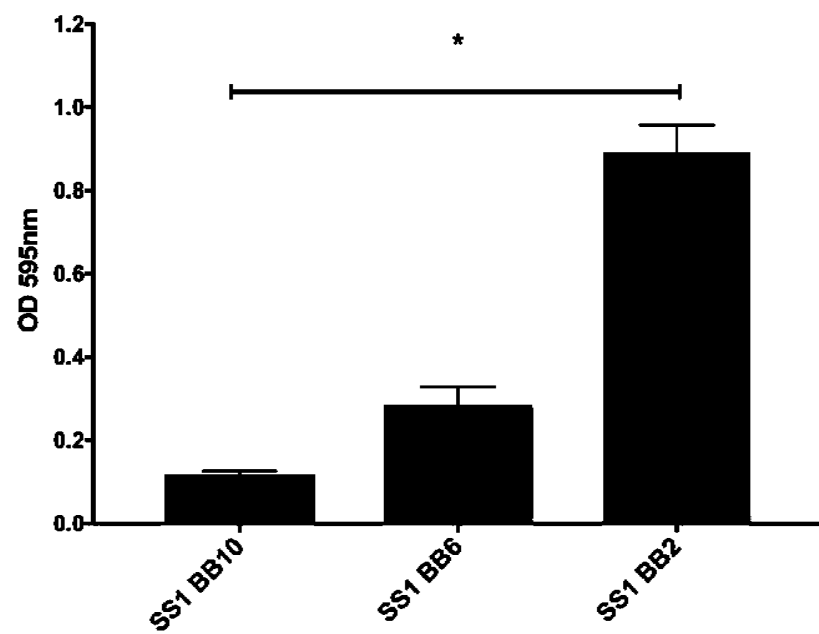**B**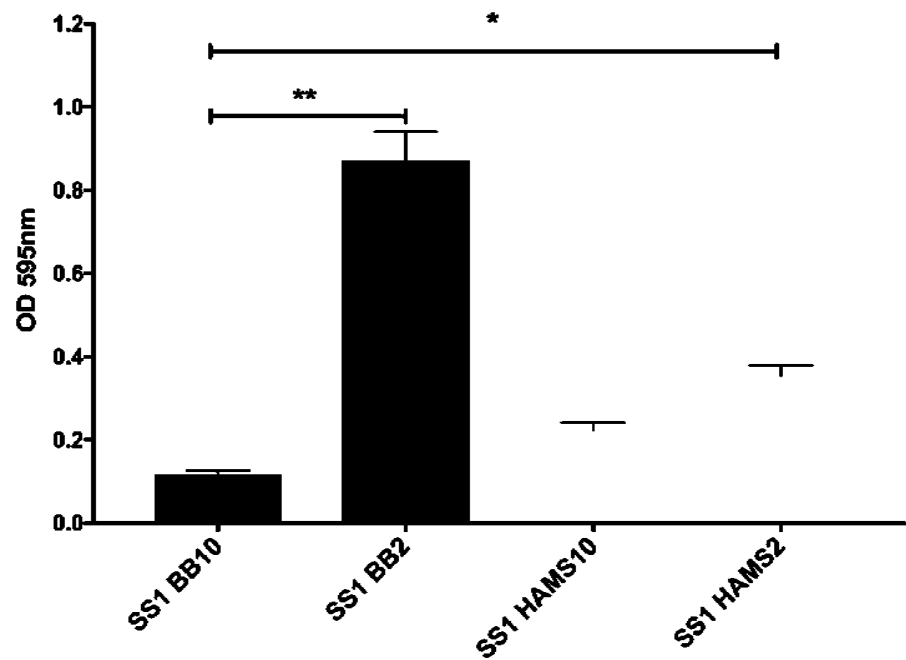**C**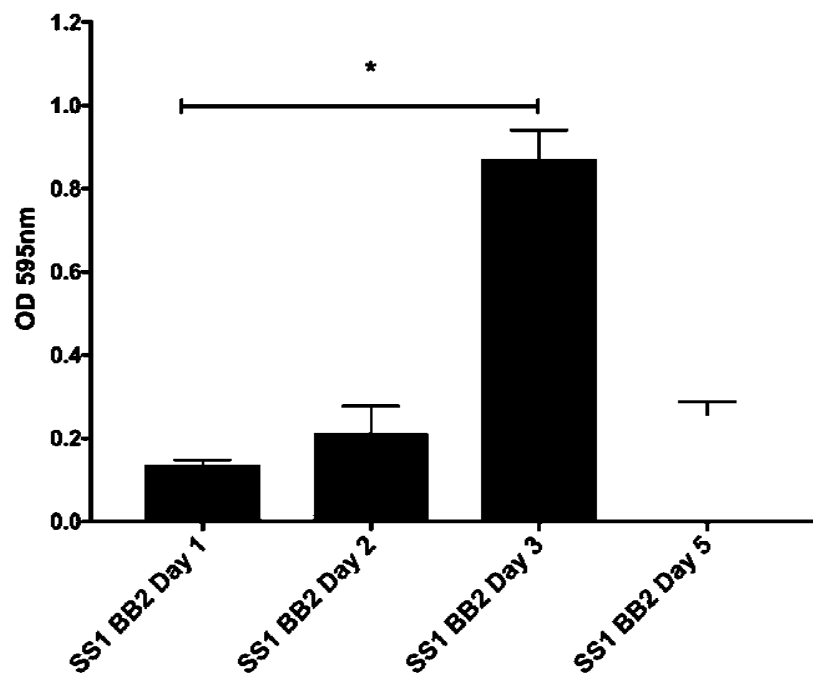

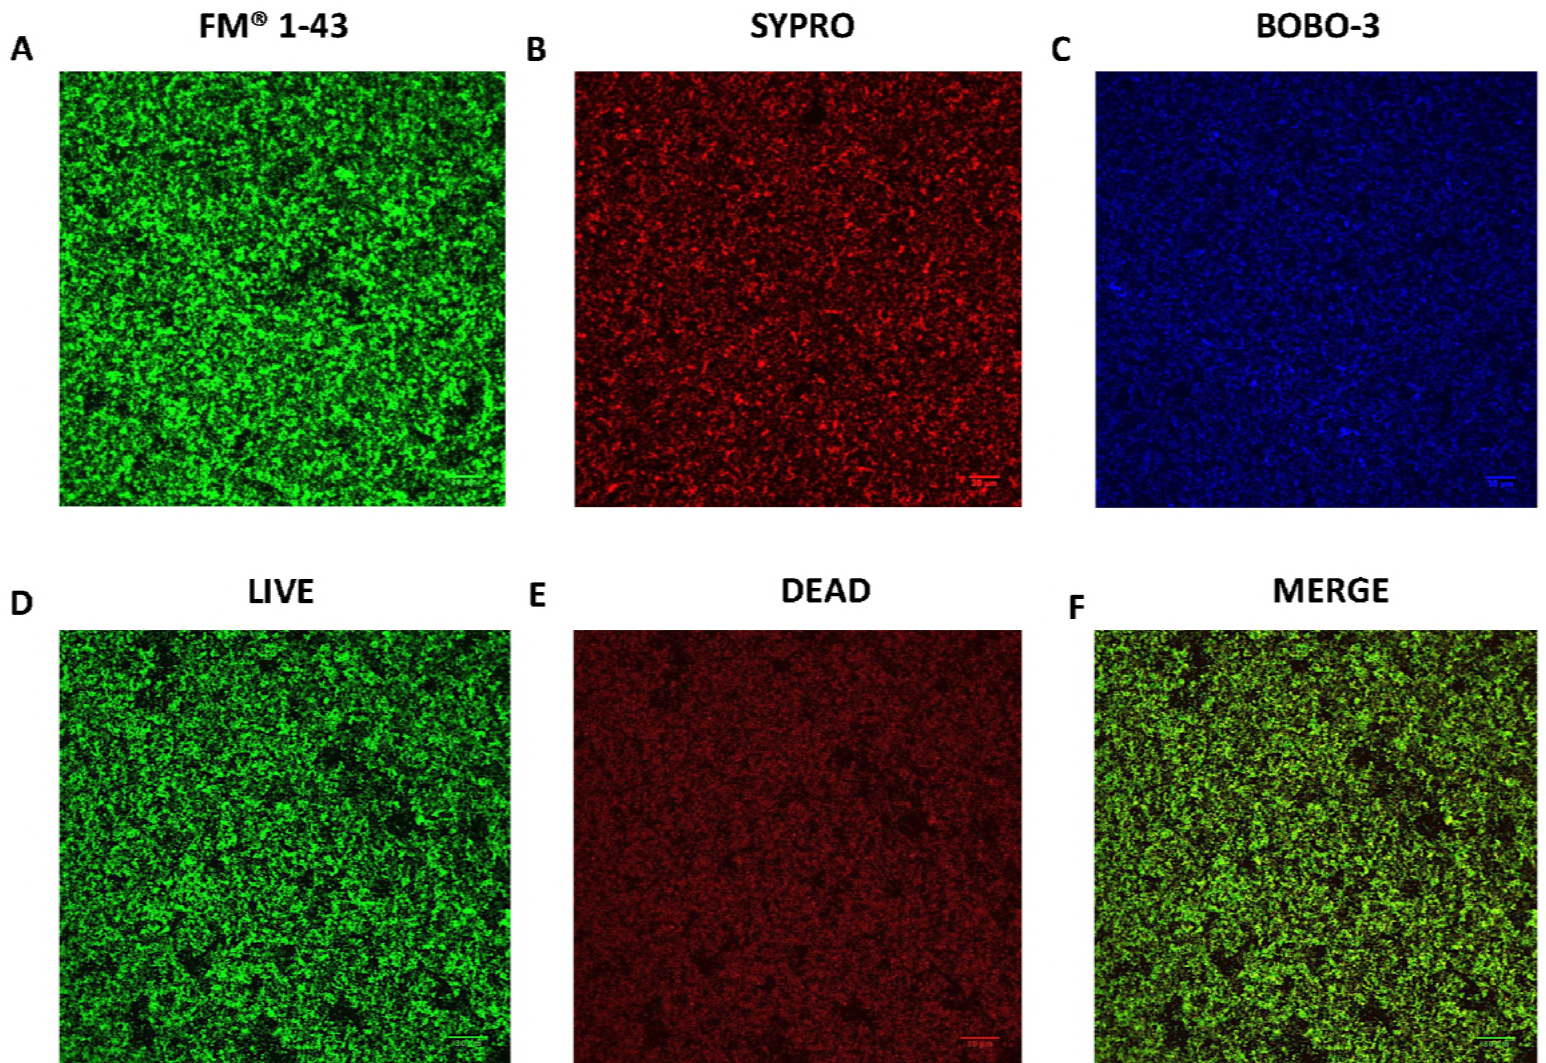

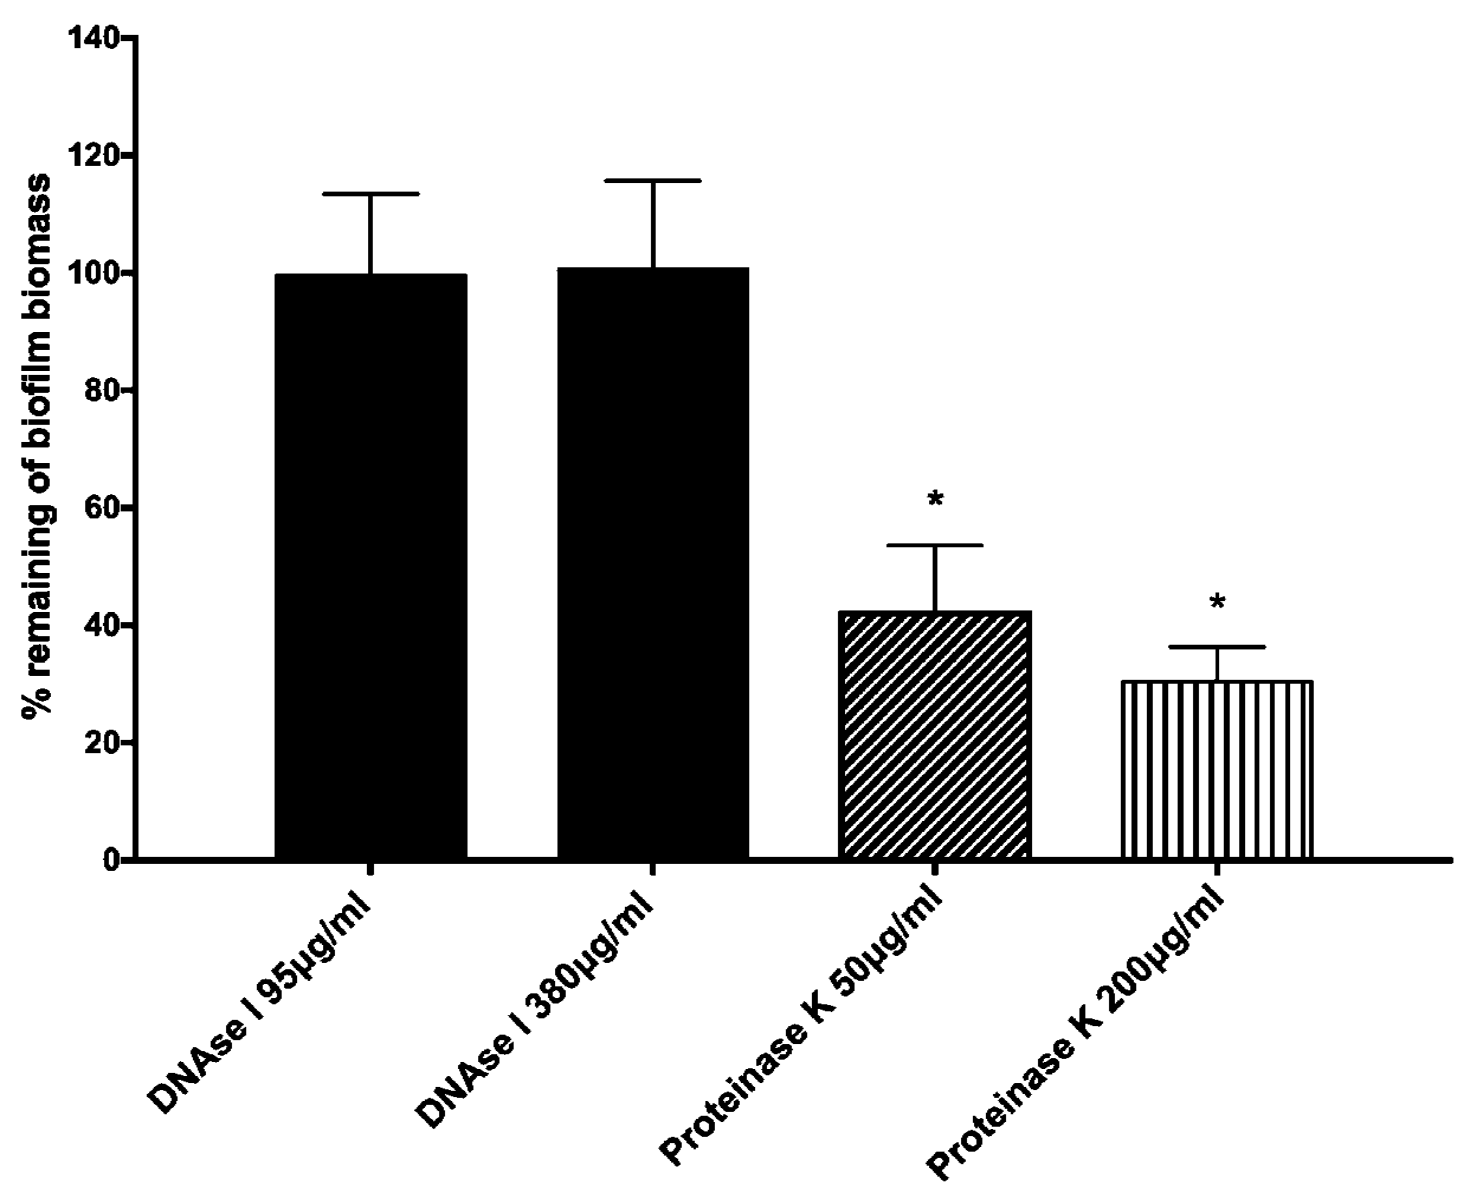

**A**

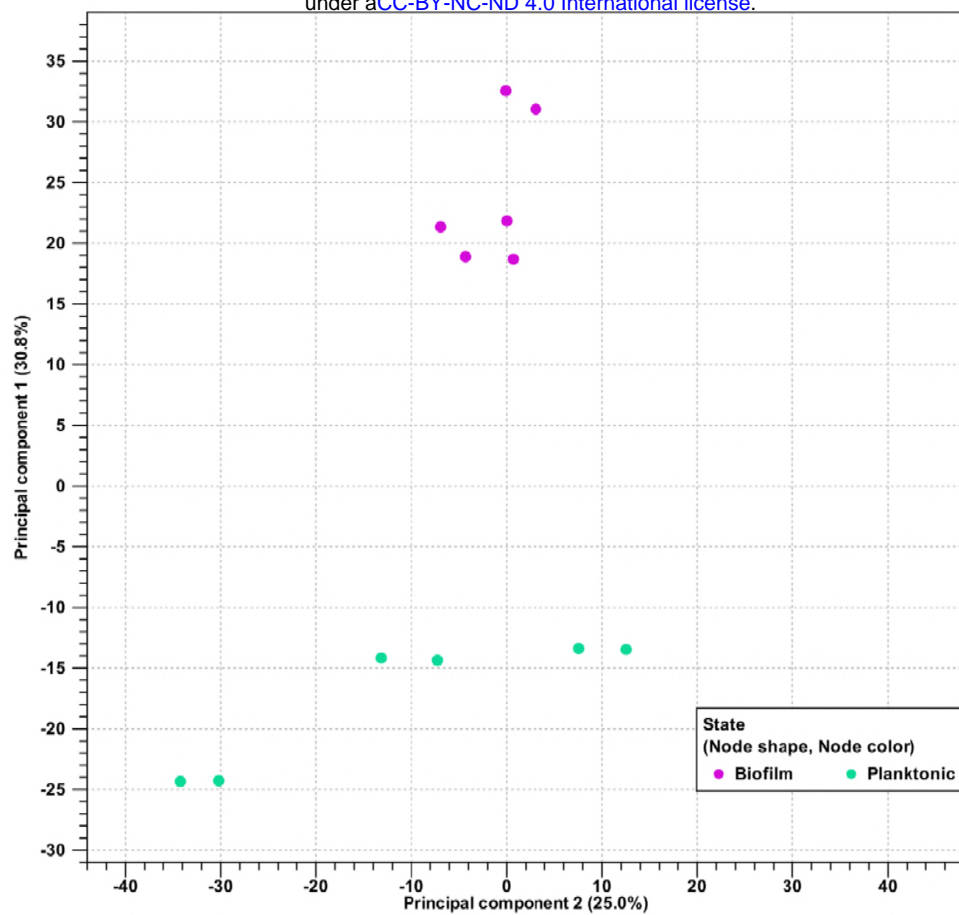

**B**

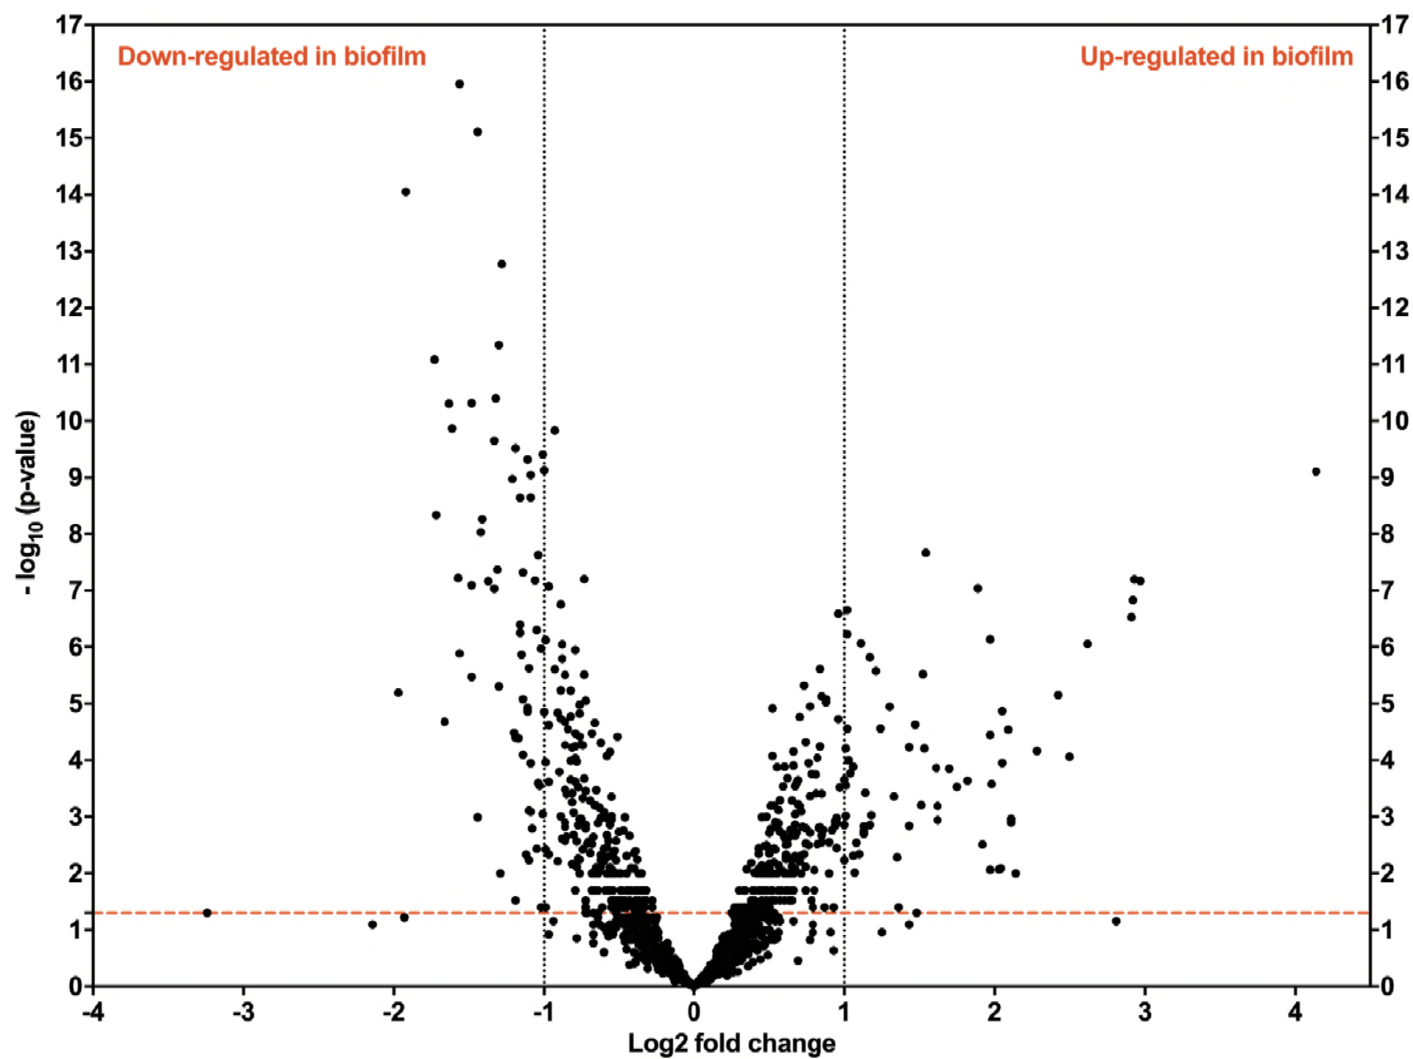

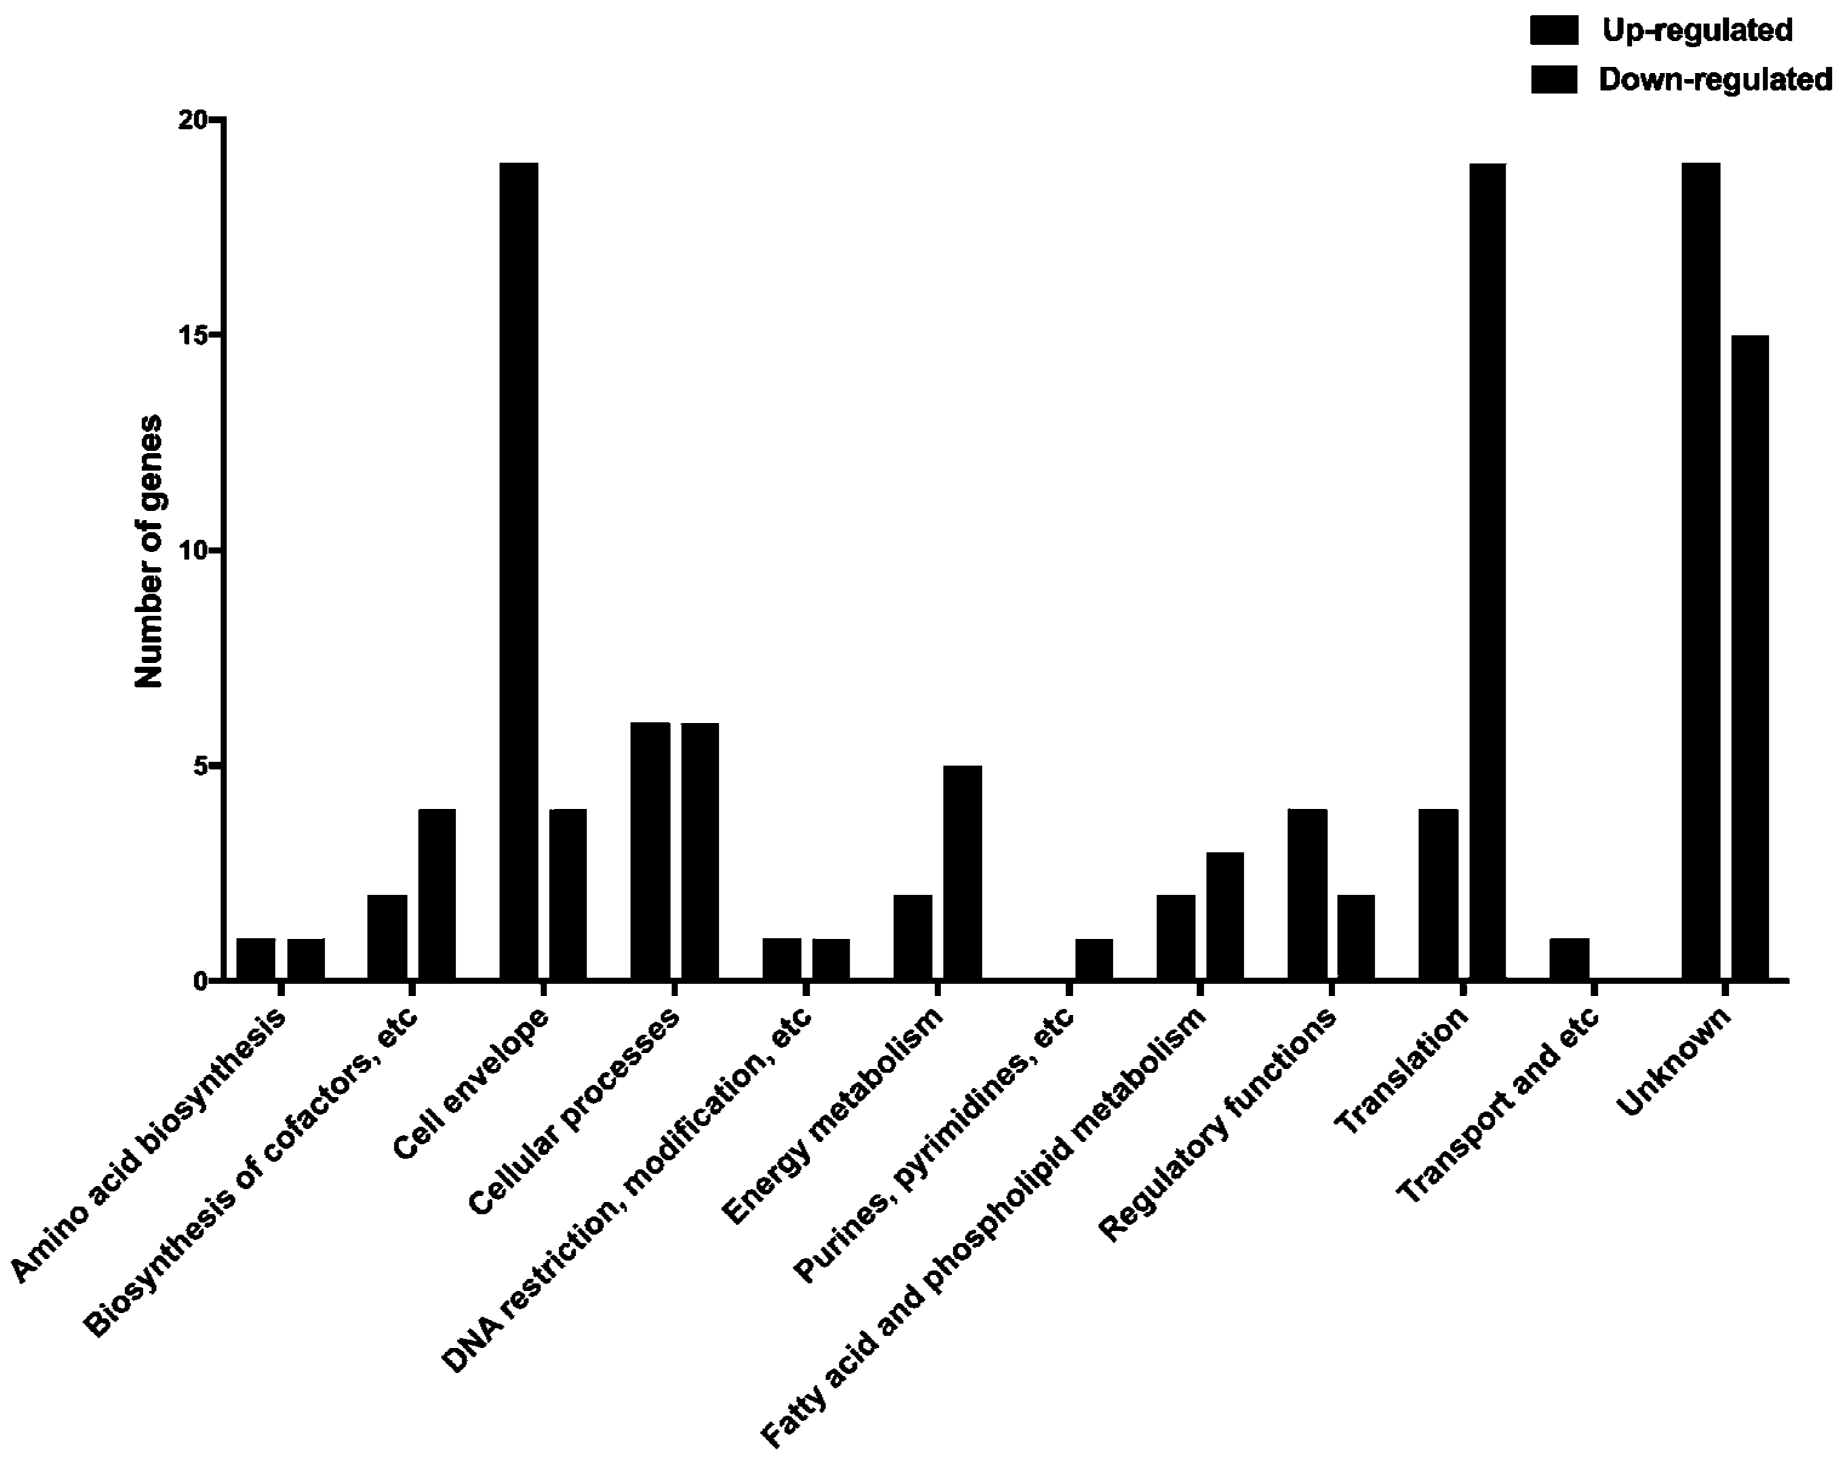

Fold change relative to control

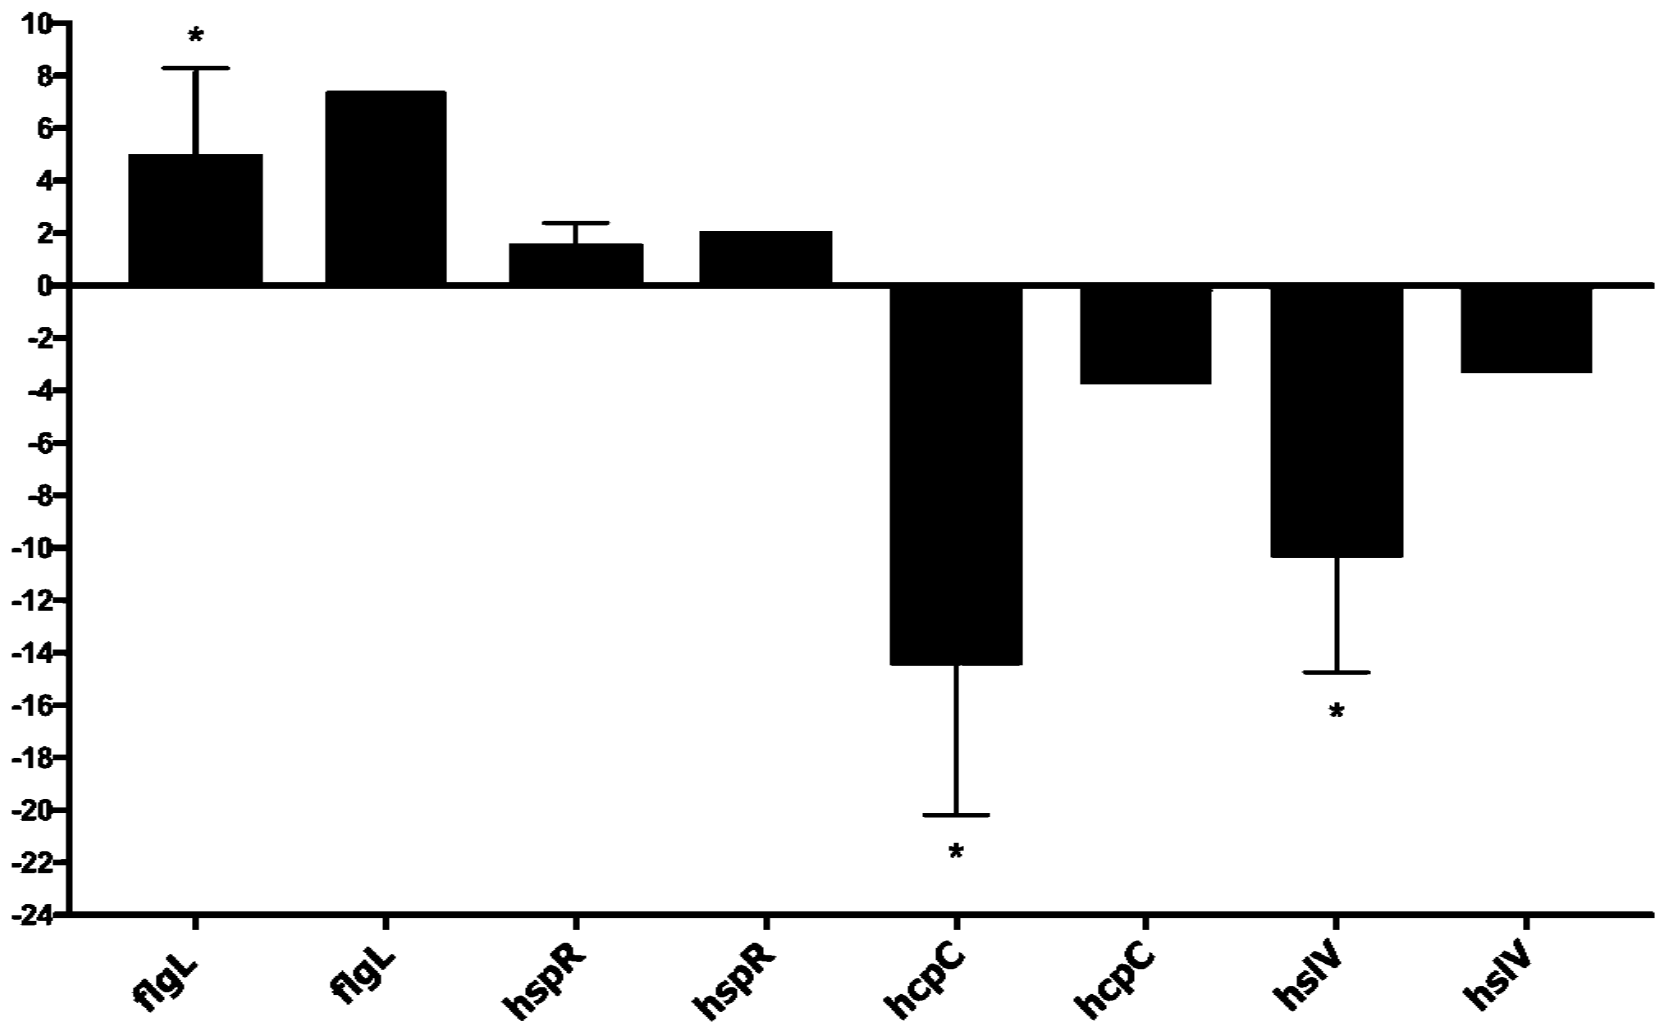



**A**

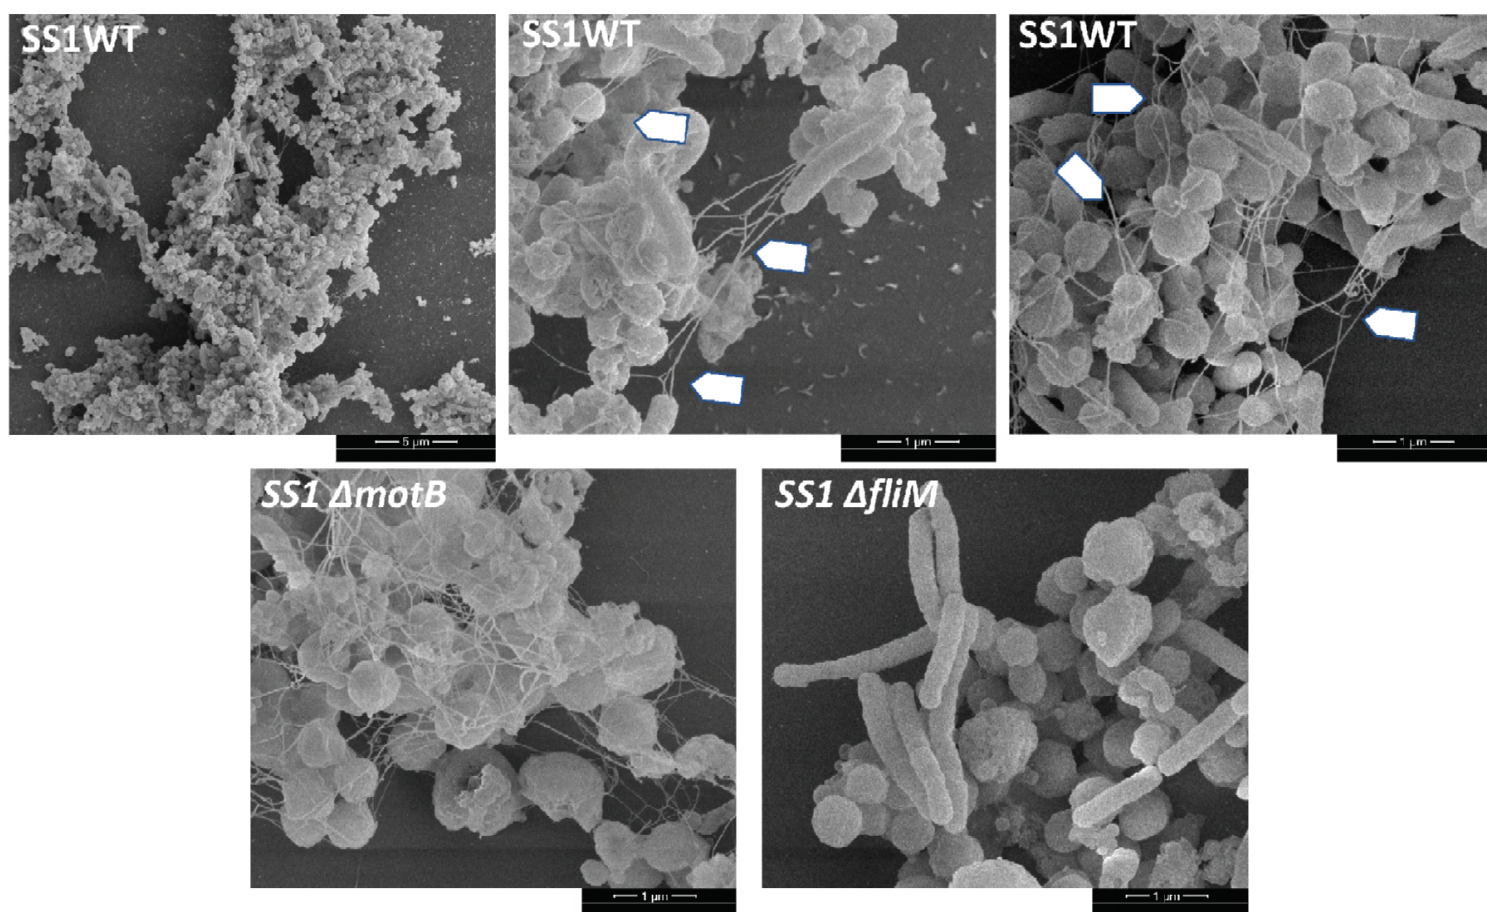

**B**

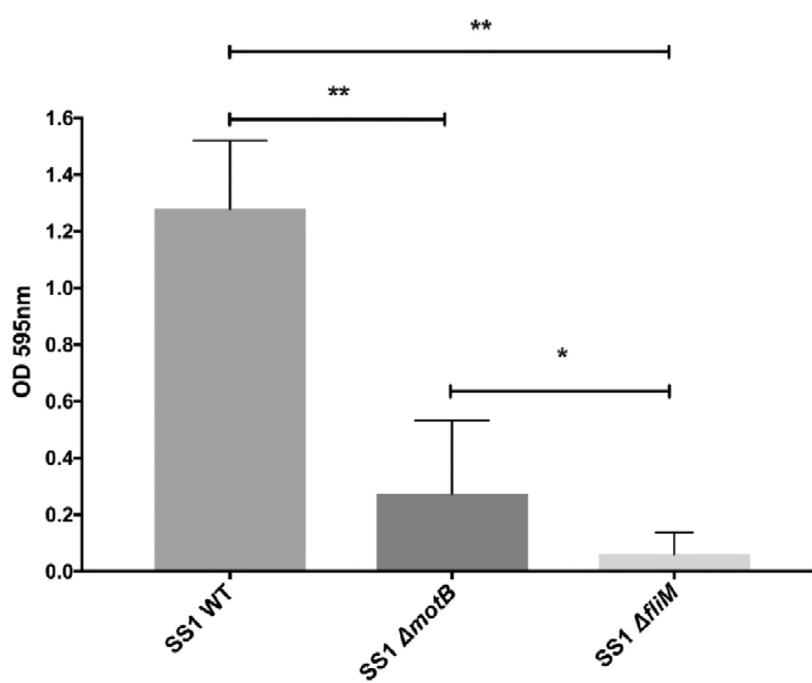

**A**

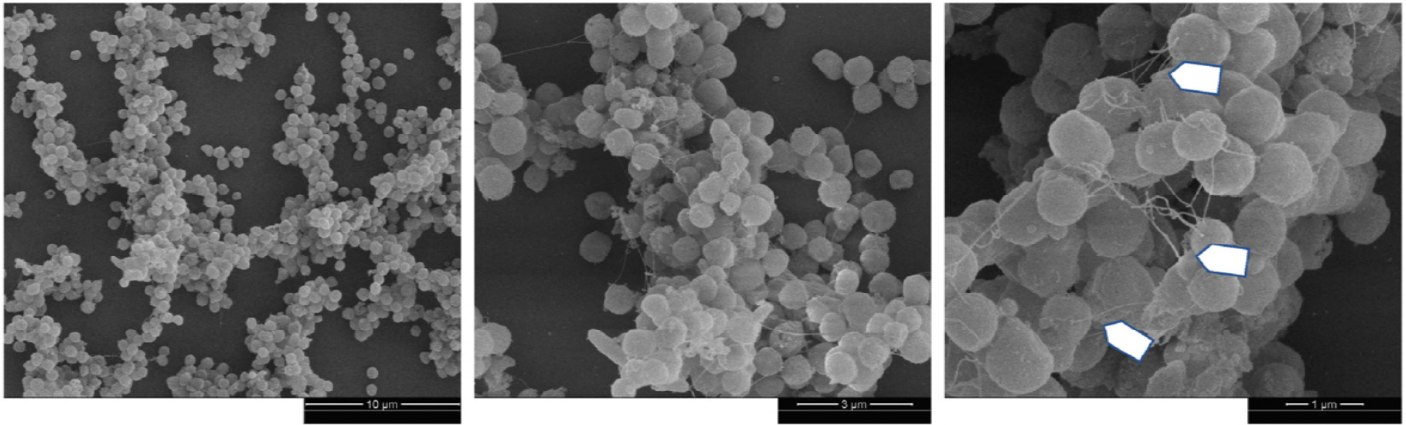

**B**

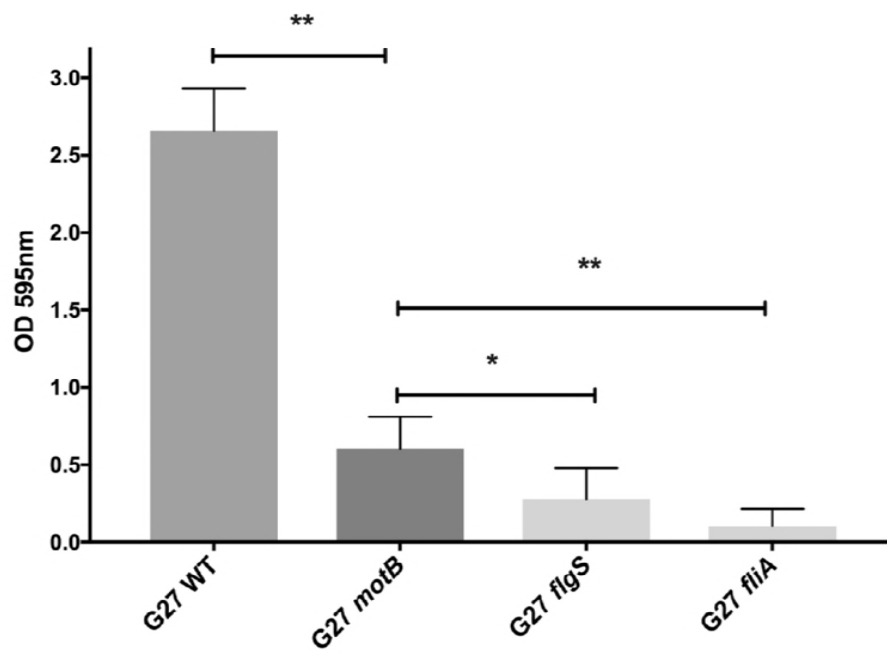

Source: http://biorxiv.org/content/10.1101/412239v1.full.pdf
